# Supplementary material for: De novo neurogenesis by targeted expression of Atoh7 to Müller glia cells
Source: Oxford University Press journal article supplement (doi:10.1242/dev.135905), 2016-01-01
Supplement: dev135905supp.pdf [file dev135905supp.pdf]

### Supplemental Figures

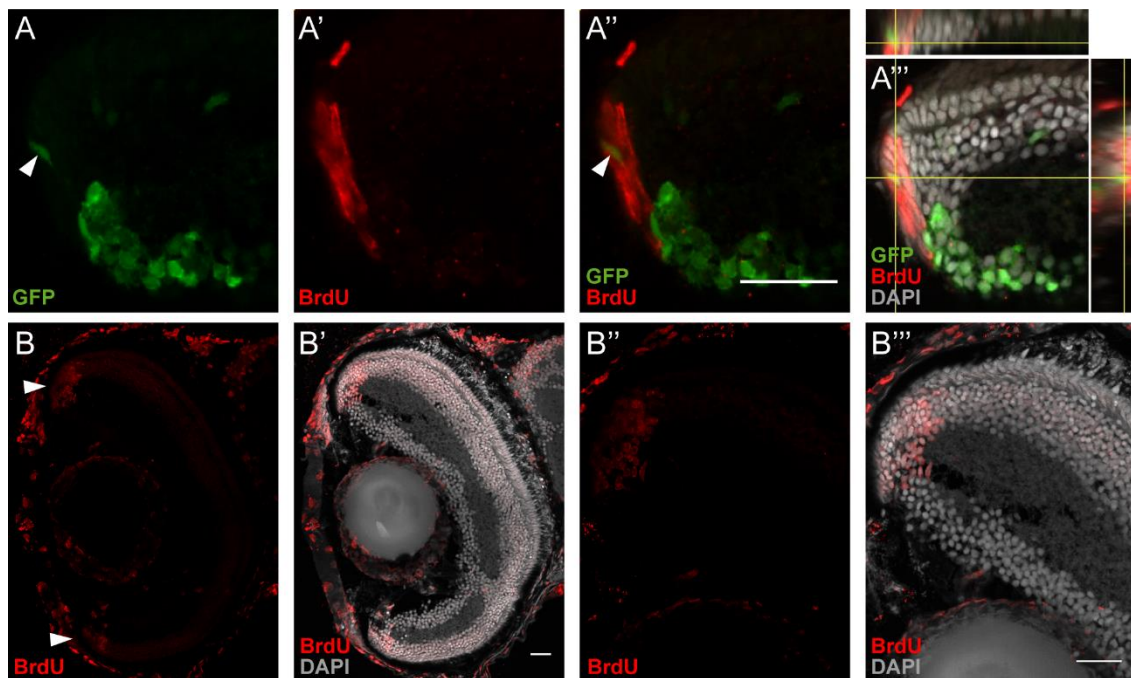

**Figure S1. Proliferation is restricted to the CMZ where *atoh7* is expressed.**

(A-A''') A short pulse of BrdU (16 hours) marks proliferating cells in the CMZ. *Atoh7*-driven EGFP (green) expression is co-localizing with BrdU (red) (arrowheads).

(B-B''') A long pulse of BrdU (7 days) marks only proliferating cells in the CMZ (arrowheads). MG cells do not incorporate BrdU in the hatchling medaka retina (n = 12 fish, data obtained from 4 independent experiments). Scale bars are 20  $\mu$ m.

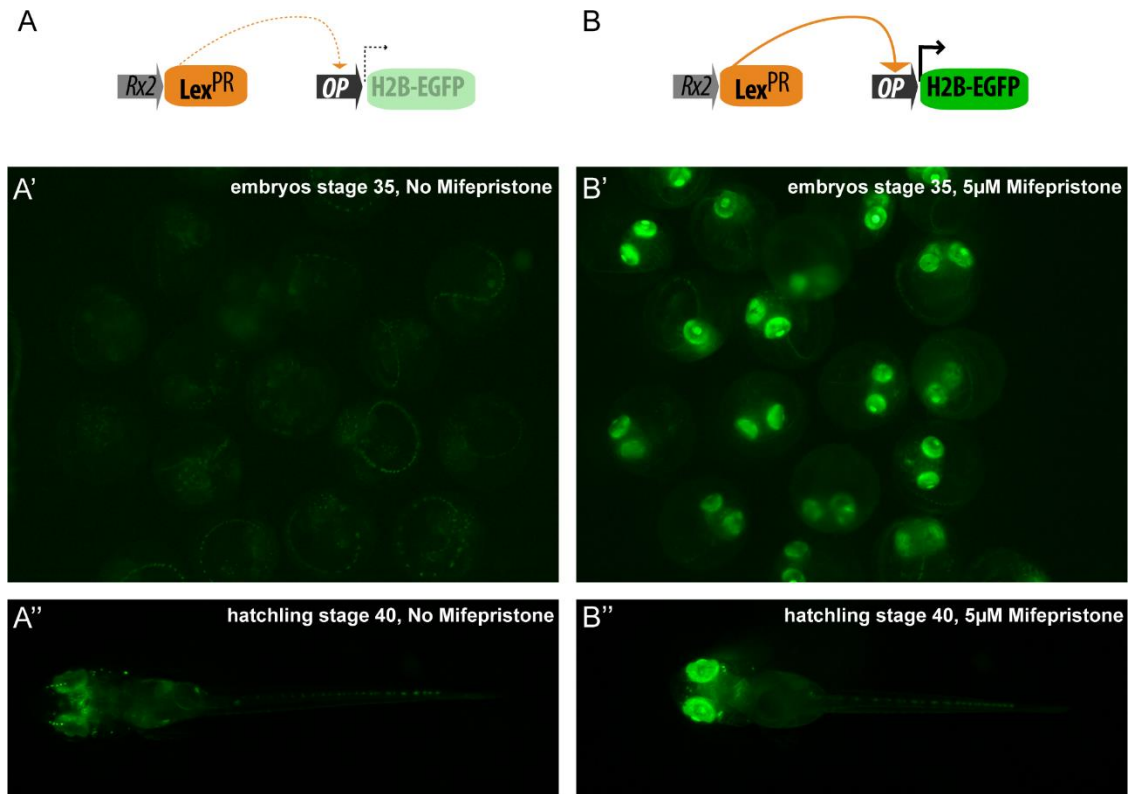

**Figure S2. Lex<sup>PR</sup> inducible gene expression in medaka.**

The Lex<sup>PR</sup> system allows targeted and inducible gene expression in medaka embryos and hatchling fish (A, B). Transgenic *rx2::Lex<sup>PR</sup> OP::EGFP* stage 35 embryos (A') and hatchling fish (A'') show no EGFP expression. Upon addition of the drug Mifepristone, EGFP is detected in the *rx2* domain of embryos (B') and hatchlings (B'').

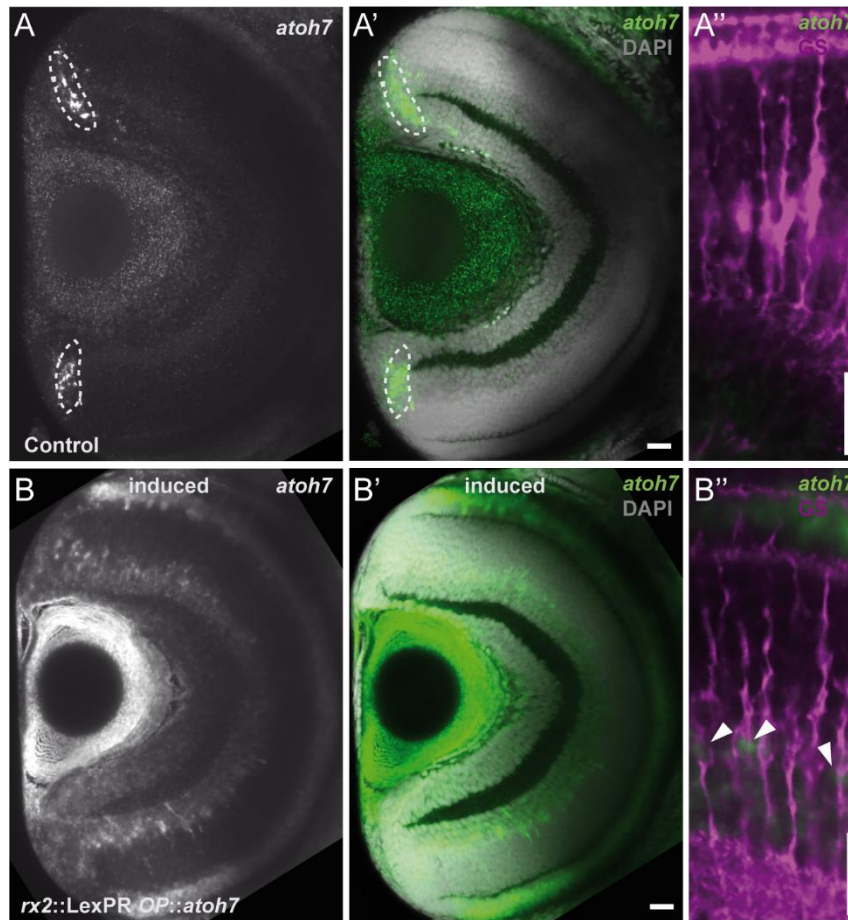

**Figure S3. Targeted expression of *atoh7* expression to Müller glia cells.**

In control fish, *atoh7* expression is only detectable in a small area next to the CMZ (dotted circle in **A**, **A'**, compare to Figure S1b). No *atoh7* expression is detected in GS positive MG cells (**A''**). Upon induction with Mifepristone, *atoh7* mRNA is detected in the ONL, in the INL and in the CMZ (**B**, **B'**). *atoh7* expression in the INL co-localizes with GS positive cells (arrowheads) (**B''**). The panels A-B'' show whole mount fluorescent *in situ* hybridizations for *atoh7* mRNA (green), antibody staining for GS (magenta) and staining for DAPI (gray). Scale bars are 20  $\mu$ m.

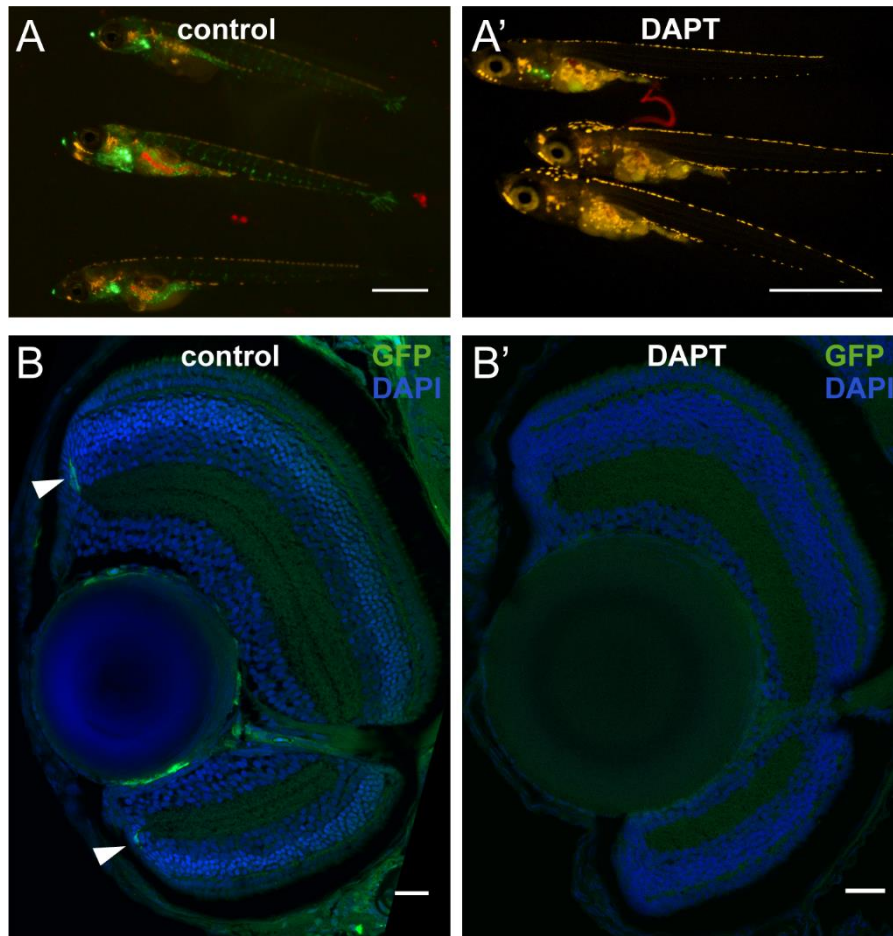

**Figure S4. The *tp1-MmHbb:d2GFP* reporter line recapitulates Notch signaling in medaka.**

(A) The *tp1-MmHbb:d2GFP* Notch transcriptional reporter is activated in various tissues such as blood vessels, brain and intestine in hatchling medaka fish. (B) Expression can also be observed in the peripheral retina (arrowheads). (A', B') Upon treatment with 50  $\mu$ M DAPT for 2 days the expression is downregulated (n=6 fish, data obtained from 2 independent experiments). Scale bars are 20  $\mu$ m.

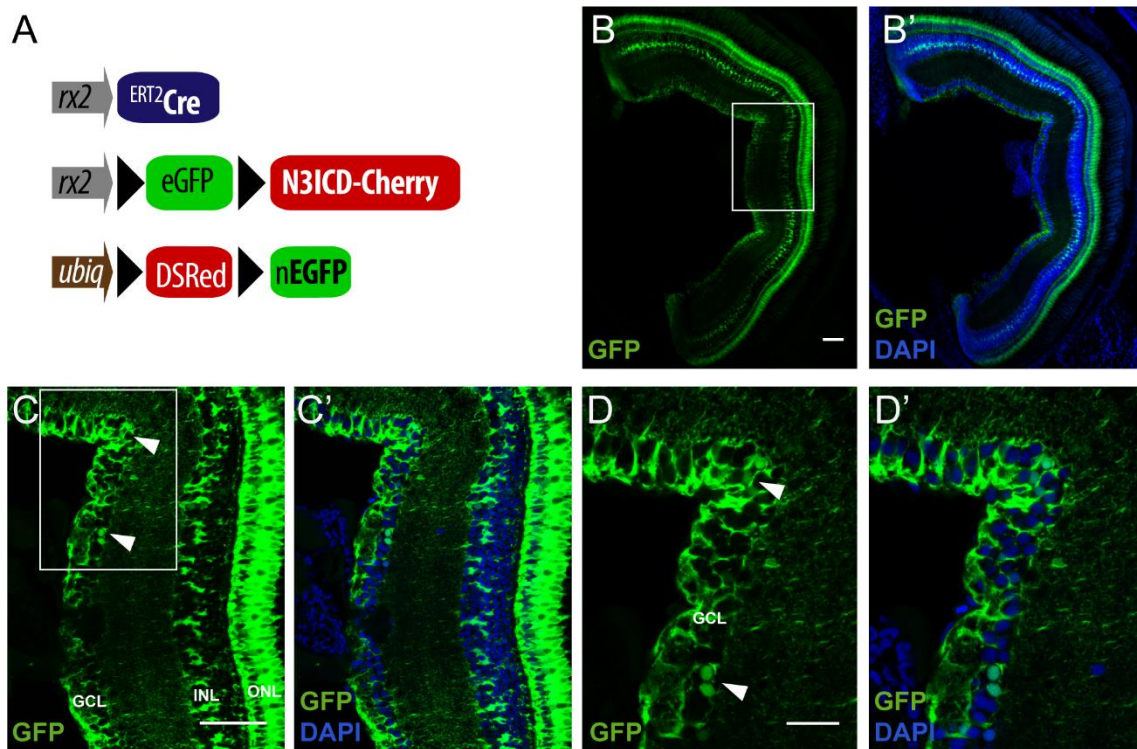

**Figure S5. Differentiation of MG cells upon targeted NICD expression.**

(A) Constructs used for 1 month-lineage analysis of MG cells upon N3ICD expression. Upon tamoxifen induction, the  $rx2::ERT2$ Cre mediates excisions resulting in the expression of N3ICD-mCherry and nuclear GFP in the recombined cells. (B-D') One month after recombination, cells expressing nuclear GFP were observed in the GCL (arrowheads) via antibody staining for GFP (green) and staining for DAPI (blue) (n=5 out of 7 fish, data obtained from 2 independent experiments). Scale bars in B and C are 50  $\mu$ m, in D 20  $\mu$ m. The rectangle in B indicates the area magnified in C and the rectangle in C the area magnified in D.

**Supplementary Table S1. List of target genes used in the MG proliferation assay.**

| <b>Target gene</b> | <b>MG proliferation</b> |
|--------------------|-------------------------|
| Ascl1a             | No                      |
| Atoh7              | Yes                     |
| CyclinD            | No                      |
| NeuroD             | No                      |
| Neurogenin         | No                      |
| Pax6               | No                      |
| Rheb               | No                      |
| Rx2                | No                      |
| Yap                | No                      |

**Supplementary Table S2. Vector sequences.**

| Vector name                           | Vector sequence                                                                                                                                                                                                                                                                                                                                                                                                                                                                                                                                                                                                                                                                                                                                                                                                                                                                                                                                                                                                                                                                                                                                                                                                                                                                                                                                                                                                                                                                                                                                                                                                                                                                                                                                                                                                                                                                                                                                                                                                                                                                                                                                                                                                                                                                                                                                                                                                                                                                                                                                                                                                                                                                                                                                                                                                                                                                                                                                                                                                                                                                                                                                       |
|---------------------------------------|-------------------------------------------------------------------------------------------------------------------------------------------------------------------------------------------------------------------------------------------------------------------------------------------------------------------------------------------------------------------------------------------------------------------------------------------------------------------------------------------------------------------------------------------------------------------------------------------------------------------------------------------------------------------------------------------------------------------------------------------------------------------------------------------------------------------------------------------------------------------------------------------------------------------------------------------------------------------------------------------------------------------------------------------------------------------------------------------------------------------------------------------------------------------------------------------------------------------------------------------------------------------------------------------------------------------------------------------------------------------------------------------------------------------------------------------------------------------------------------------------------------------------------------------------------------------------------------------------------------------------------------------------------------------------------------------------------------------------------------------------------------------------------------------------------------------------------------------------------------------------------------------------------------------------------------------------------------------------------------------------------------------------------------------------------------------------------------------------------------------------------------------------------------------------------------------------------------------------------------------------------------------------------------------------------------------------------------------------------------------------------------------------------------------------------------------------------------------------------------------------------------------------------------------------------------------------------------------------------------------------------------------------------------------------------------------------------------------------------------------------------------------------------------------------------------------------------------------------------------------------------------------------------------------------------------------------------------------------------------------------------------------------------------------------------------------------------------------------------------------------------------------------------|
| <i>cmIc2::ECFP</i><br><i>OP::EGFP</i> | AAATTGTAAACGTTAATATTTTGTAAAATTGCGGTTAAATTTTTGTAAATCAGCTCAT<br>TTTTAAACCAATAGGCCGAAATCGGCAAATCCCTTATAAATCAAAGAATAGACCGA<br>GATAGGGTTGAGTGTGTTCCAGTTTGGAAACAAGAGTCCACTATTAAGAACGTGGA<br>CTCCAACGTCAAAGGGCGAAAAACCGTCTATCAGGGCGATGGCCACTACGTGAACC<br>ATCACCTAATCAAGTTTTTTGGGGTCGAGGTGCCGTAAAGCACTAAATCGGAACCCT<br>AAAGGGAGCCCCGATTTAGAGCTTGACGGGGAAAGCCGGCGAACGTGGCGAGAAA<br>GGAAGGGAAGAAAGCGAAAGGAGCGGGCGCTAGGGCGCTGGCAAGTGTAGCGGTC<br>ACGCTGCGCGTAACCACCACACCCGCCGCGCTTAATGCGCCGCTACAGGGCGCGTCC<br>CATTGCGCATTGAGGCTGCGCAACTGTTGGGAAGGGCGATCGGTGCGGGCCTCTTCG<br>CTATTACGCCAGCTGGCGAAAGGGGGATGTGCTGCAAGGCGATTAAGTTGGGTAAC<br>GCCAGGGTTTTCCAGTCACGACGTTGTA AACGACGGCCAGTGAGCGCGTAGGGAT<br>AACAGGGTAATGCGCGGTAATACGACTCACTATAGGGCGAATTGGGAGCTTAAATC<br>AGTTGTGTTAAATAAGAGACATTCAAATAAATGTAATGAGCTCTCAAATCAGCAG<br>ACTTAACATTCTTTAAAATGATTGATTCAATAGTGATAAAAATCAGGCATAGCCAGTTG<br>TAACCTTAGATAAATTACAGAAAATGTCAAATACAGAGAACCATTCTTTTTATGATA<br>CATCCAAGCACACATTTAACACAATCCAGGCAAACCCCGAATTTACAGTCACAAGCA<br>CTGTTTGTACAAGAGCTTTCCTAAGGACACACAGTCTCTATAAGTCCAGGTCGTTGG<br>TTCACTCTTATTTAAACATGTGACATTTTCTGCCATCCTGTCTTAGGCTGCTGTTT<br>GCTTCATTCCATGTACATTAATTCCTCAGTAGCACCTTTACACACACAGCCAATCTT<br>TTCCAGAAAATCAATTGCTTTGAAGAGATAATGTGTGAACAAATCCATTTAGAAAAG<br>GAAAATTAAGAATTTGTA AATCATCTGTAAATTGTTGGCATTCTTCTGTATATGAACA<br>TCACATCATTTACAGGTAAAGGTCTGGTCATTAATTATATGACAATTTACTGGTATTAT<br>TTTGTGAAAGGGGCTATTTCAATGCGTTCATCCATCTTTTATCCCTCAAATCTCTCA<br>TTCAGTCCCCTCCCCTCTGCACACTTTATCTCATTTCACCCCTGCTGGAATCTGAG<br>CACTTGTGCAGTTATCAGGGCTCCTGTATTTAGGAGGCTCTGGGTGTCATGTAGGGG<br>ACGAACAGAAACACTGCAGACCTTTATAGAAGAACAATTGATAAGAGTCCTCATAAT<br>AAAGACTCCATTAGTAAGCCAGTGACCCAGGAGCCAGACCAACAGCAAAGCAGACA<br>GTGACCATGGTGAGCAAGGGCGAGGAGCTGTTACCGGGGTGGTGCCCATCCTGGT<br>CGAGCTGGACGGCGACGTAAACGGCCACAAGTTCAGCGTGTCCGGCGAGGGCGAGG<br>GCGATGCCACCTACGGCAAGCTGACCCTGAAGTTCATCTGCACCACCGGCAAGCTGCC<br>CGTGCCCTGGCCACCCTCGTGACCACCCTGACCTGGGGCGTGAGTGTTCAGCCGC<br>TACCCCGACCACATGAAGCAGCAGACTTCTCAAGTCCGCCATGCCCGAAGGCTACG<br>TCCAGGAGCGACCATCTTCTCAAGGACGACGGCAACTACAAGACCCGCGCCGAGG<br>TGAAGTTCGAGGGCGACACCCTGGTGAACCGCATCGAGCTGAAGGGCATCGACTTCA<br>AGGAGGACGGCAACATCCTGGGGCACAAGCTGGAGTACAACACTACATCAGCCACAAC<br>GTCTATATCACCGCCGACAAGCAGAAGAACGGCATCAAGGCCAACTTCAAGATCCGC<br>CACAACATCGAGGACGGCAGCGTGACGCTCGCCGACCACTACCAGCAGAACACCCCC<br>ATCGGCGACGGCCCCGTGCTGCTGCCCGACAACCACTACCTGAGCACCCAGTCCGCCC<br>TGAGCAAAGACCCCAACGAGAAGCGGATCACATGGTCTGCTGGAGTTCGTGACCG<br>CCGCCGGGATCACTCTCGGCATGGACGAGCTGTACAAGTAAAGCGGCCAAACCCGCT<br>GATCAGCCTCGACTGTGCCTTCTAGTTGCCAGCCATCTGTTGTTTCCCCCTCCCCCGTG<br>CCTTCCTGACCCTGGAAGGTGCCACTCCCCTGTCTTTCCTAATAAAATGAGGAAAT<br>TGCATCGCATTGTCTGAGTAGGTGTCATTCTATTCTGGGGGTGGGGTGGGGCAGGA<br>CAGCAAGGGGGAGGATTGGGAAGACAATAGCAGGCATGCTGGGGATGCGGTGGGC<br>TCTATGGCTTCTGAGGCGAAAGAACCAGCACGTGGCGCCTAGGCCGCCGATCGTCG<br>ACTAGTTATAATTTAAATTAAGATTGAATCCTGTTGCCGGTCTTGCGATGATTATCATA<br>TAATTTCTGTTGAATTACGTTAAGCATGTAATAATTAACATGTAATGCATGACGTTATT<br>TATGAGATGGGTTTTATGATTAGAGTCCCGAATTATACATTTAATACGCGATAGAA<br>AACAAAATATAGCGCGAAACTAGGATAAATTATCGCGCGCGGTGTCATCTATGTTAC<br>TAGATCGGGAATTGATCCCCCTCGACAGCTTGCATGCCGCTGGGCTGCAGGTGCA |

GGCTAAAAAACTAATCGCATTATCATCCCCTCGACGTACTGTACATATAAACCCTGGTT  
TTATATACAGCAGTACTGTACATATAAACCCTGGTTTTATATACAGCAGTCGACGTACT  
GTACATATAAACCCTGGTTTTATATACAGCAGTACTGTACATATAAACCCTGGTTTTAT  
ATACAGCAGTCGAGGTAAGATTAGATATGGATATGTATATGGATATGTATATGGTGG  
TAATGCCATGTAATATGCTCGACTCTAGGATCTTCGCAAGACCCTTCTCTATATAAGG  
AAGTTCATTTCAATTTGGAGAGGACACGCTGAAGCTAGTCGACTCTAGCCTCGAATTCT  
GCAGTCGACGGTACCGCGGGCCCGGGATCCCCGCCACCATGGTGAGCAAGGGCGAGG  
AGCTGTTACCCGGGGTGGTGCCCATCCTGGTTCGAGCTGGACGGCGACGTAACCGGCC  
ACAAGTTCAGCGTGTCCGGCGAGGGCGAGGGCGATGCCACCTACGGCAAGCTGACC  
CTGAAGTTCATCTGCACCACCGCAAGCTGCCCGTGCCTGGCCACCCTCGTGACCA  
CCCTGACCTACGGCGTGCAGTGCTTACGCCGCTACCCCGACCACATGAAGCAGCACGA  
CTTCTTCAAGTCCGCCATGCCCGAAGGCTACGTCCAGGAGCGCACCATCTTCTTCAAG  
GACGACGGCAACTACAAGACCCGCGCCGAGGTGAAGTTCGAGGGCGACACCCTGGT  
GAACCGCATCGAGCTGAAGGGCATCGACTTCAAGGAGGACGGCAACATCCTGGGGC  
ACAAGCTGGAGTACAACATAACAGCCACAACGTCTATATCATGGCCGACAAGCAGA  
AGAACGGCATCAAGGTGAACCTCAAGATCCGCCACAACATCGAGGACGGCAGCGTGC  
AGCTCGCCGACCACTACCAGCAGAACACCCCATCGGCGACGGCCCCGTGCTGCTGCC  
CGACAACCACTACCTGAGCACCCAGTCCGCCCTGAGCAAAGACCCCAACGAGAAGCG  
CGATCACATGGTCTGCTGGAGTTCGTGACCGCCGCGGGATCACTCTCGGCATGGA  
CGAGCTGTACAAGTAAAGCGGCCCTCTCGAGGTGACGGTATCGATAAGCTTGATA  
TCGAATTCCTGCAGCCCGGGGATCCACTAGTTCTAGAGCGGCCGCCACCGCGGTGG  
AGCTCCAGCTTTTGTCCCTTTAGTGAGGGTTAATTGCGCGCATTACCCTGTTATCCCT  
ACGCGCTTGGCGTAATCATGGTCTAGCTGTTTCTGTGTGAAATTGTTATCCGCTCAC  
AATTCACACAACATACGAGCCGGAAGCATAAAGTGTAAGCCTGGGGTGCCTAATG  
AGTGAGCTAACTCACATTAATTGCGTTGCGCTCACTGCCCGCTTCCAGTCGGGAAAC  
CTGTGCTGCCAGCTGCATTAATGAATCGGCCAACGCGCGGGGAGAGGGCGGTTTGCCT  
ATTGGGCGCTTCCGCTTCTCGCTCACTGACTCGTGCCTCGGTGCTTCCGGTGC  
GCGAGCGGTATCAGCTCACTCAAAGGCGGTAATACGGTTATCCACAGAATCAGGGGA  
TAACGCAGGAAAGAACATGTGAGCAAAGGCCAGCAAAGGCCAGGAACCGTAAAA  
AGGCCGCGTTGCTGGCGTTTTTCCATAGGCTCGGCCCCCTGACGAGCATCAGAAAA  
TCGACGCTCAAGTCAGAGGTGGCGAAACCCGACAGGACTATAAAGATACCAGGCGTT  
CCCCCTGGAAGCTCCCTCGTGCGCTCCTGTTCCGACCCTGCCGCTTACGGGATACC  
TGTCGCTTTCTCCCTCGGGAAGCGTGCGCTTTCTCAATGCTCACGCTGTAGGTAT  
CTCAGTTCGGTGTAGGTGTTGCTCCAAGCTGGGCTGTGTGCACGAACCCCCGTT  
AGCCCGACCGCTGCGCCTTATCCGTAACATATCGTCTTGTAGTCCAACCCGGTAAGACA  
CGACTTATCGCCACTGGCAGCAGCCACTGGTAACAGGATTAGCAGAGCGAGGTATGT  
AGGCGGTGCTACAGAGTCTTGAAGTGGTGGCCTAACTACGGCTACACTAGAAGGAC  
AGTATTTGGTATCTGCGCTCTGCTGAAGCCAGTTACCTTCGGAAGAAAGAGTTGGTAGC  
TCTTGATCCGGCAAACAAACCACCGCTGGTAGCGGTGGTTTTTTGTTTGAAGCAGC  
AGATTACGCGCAGAAAAAAGGATCTCAAGAAGATCCTTTGATCTTTTCTACGGGGTC  
TGACGCTCAGTGGAACGAAAACTCACGTTAAGGGATTTTGGTATGAGATTATCAAAA  
AGGATCTTACCTAGATCCTTTAAATTAATAAAGTAAATCAATCTAAAGTAT  
ATATGAGTAAACTTGGTCTGACAGTTACCAATGCTTAATCAGTGAGGCACCTATCTCA  
GCGATCTGTCTATTTGTTTATCCATAGTTGCTGACTGCCCGTGTGTAGATAACTAC  
GATACGGGAGGGCTTACCATCTGGCCCCAGTGTGCAATGATACCGCGAGACCCACG  
CTCACCGCTCCAGATTTATCAGCAATAAACCAGCCAGCCGGAAGGGCCGAGCGCAG  
AAGTGGTCTGCAACTTTATCCGCTCCATCCAGTCTATTAATTGTTGCCGGGAAGCTA  
GAGTAAGTAGTTCGCCAGTTAATAGTTTGCGCAACGTTGTTGCCATTGCTACAGGCAT  
CGTGGTGTACGCTCGTCTGTTGGTATGGCTTCATTCAGCTCCGGTTCCCAACGATCAA  
GGCGAGTTACATGATCCCCATGTTGTGAAAAAAGCGGTTAGCTCCTTCGGTCTCC  
GATCGTTGTCAGAAGTAAGTTGGCCGAGTGTATCACTCATGCTTATGGCAGCACTG  
CATAATTCTTACTGTCATGCCATCCGTAAGATGCTTTTCTGTGACTGGTGAAGTACTC  
AACCAAGTCATTCTGAGAATAGTGTATGCGGCGACCGAGTTGCTTGGCCGGCGTCA



|                                 |                                                                                                                                                                                                                                                                                                                                                                                                                                                                                                                                                                                                                                                                                                                                                                                                                                                                                                                                                                                                                                                                                                                                                                                                                                                                                                                                                                                                                                                                                                                                                                                                                                                                                                                                                                                                                                                                                                                                                                                                                                                                                                                                                                                                                                                                                                                                                                                                                                                                                                                                                                                                                                                                                                                                                                                                                                                                                                                                                                                                                                     |
|---------------------------------|-------------------------------------------------------------------------------------------------------------------------------------------------------------------------------------------------------------------------------------------------------------------------------------------------------------------------------------------------------------------------------------------------------------------------------------------------------------------------------------------------------------------------------------------------------------------------------------------------------------------------------------------------------------------------------------------------------------------------------------------------------------------------------------------------------------------------------------------------------------------------------------------------------------------------------------------------------------------------------------------------------------------------------------------------------------------------------------------------------------------------------------------------------------------------------------------------------------------------------------------------------------------------------------------------------------------------------------------------------------------------------------------------------------------------------------------------------------------------------------------------------------------------------------------------------------------------------------------------------------------------------------------------------------------------------------------------------------------------------------------------------------------------------------------------------------------------------------------------------------------------------------------------------------------------------------------------------------------------------------------------------------------------------------------------------------------------------------------------------------------------------------------------------------------------------------------------------------------------------------------------------------------------------------------------------------------------------------------------------------------------------------------------------------------------------------------------------------------------------------------------------------------------------------------------------------------------------------------------------------------------------------------------------------------------------------------------------------------------------------------------------------------------------------------------------------------------------------------------------------------------------------------------------------------------------------------------------------------------------------------------------------------------------------|
|                                 | <p>ATACGGGATAATACCGCGCCACATAGCAGAACTTTAAAAGTGCTCATCATTGGAAAAC<br/> GTTCTTCGGGGCGAAAACCTCAAGGATCTTACCGCTGTTGAGATCCAGTTCGATGTA<br/> ACCCACTCGTGCACCCACTGATCTTCAGCATCTTTACTTTACCAGCGTTTCTGGGT<br/> GAGCAAAAACAGGAAGGCAAATGCCGCAAAAAAGGGAATAAGGGCGACACGGAA<br/> ATGTTGAATACTCATACTCTTCTTTTTCAATATTATTGAAGCATTATCAGGGTTATTG<br/> TCTCATGAGCGGATACATATTTGAATGTATTTAGAAAAATAAACAAATAGGGGTTCCG<br/> CGCACATTTCCCCGAAAAGTGCCACCTG</p>                                                                                                                                                                                                                                                                                                                                                                                                                                                                                                                                                                                                                                                                                                                                                                                                                                                                                                                                                                                                                                                                                                                                                                                                                                                                                                                                                                                                                                                                                                                                                                                                                                                                                                                                                                                                                                                                                                                                                                                                                                                                                                                                                                                                                                                                                                                                                                                                                                                                                                                                                                                                        |
| <p>rx2::LexPR<br/> OP::EGFP</p> | <p>AAATTGTAAACGTTAATATTTTGTAAAATTCGCGTTAAATTTTTGTTAAATCAGCTCAT<br/> TTTTAAACCAATAGGCCGAAAATCGGCAAAATCCCTTATAAATCAAAGAATAGACCGA<br/> GATAGGGTTGAGTGTGTTCCAGTTTGGAAACAAGAGTCCACTATTAAGAACGTGGA<br/> CTCCAACGTCAAAGGGCGAAAAACCGTCTATCAGGGCGATGGCCACTACGTGAACC<br/> ATCACCTAATCAAGTTTTTTGGGGTCGAGGTGCCGTAAAGCACTAAATCGGAACCCT<br/> AAAGGGAGCCCCGATTTAGAGCTTGACGGGGAAAGCCGGCGAACGTGGCGAGAAA<br/> GGAAGGGAAGAAAGCGAAAGGAGCGGGCGCTAGGGCGCTGGCAAGTGTAGCGGTC<br/> ACGCTGCGCGTAACCACCACACCCGCCGCGCTTAATGCGCCGCTACAGGGCGCGTCC<br/> CATTCCGCATTAGGCTGCGCAACTGTTGGGAAGGGCGATCGGTGCGGGCCTCTTCG<br/> CTATTACGCCAGCTGGCGAAAGGGGGATGTGCTGCAAGGCGATTAAGTTGGGTAAC<br/> GCCAGGGTTTTCCAGTCACGACGTTGTA AACGACGGCCAGTGAGCGCGTAGGGAT<br/> AACAGGGTAATGCGCGGTAATACGACTCACTATAGGGCGAATTGGGTACCGTGCA<br/> CCGACTTTCTTCATGGTGACCATATGGCAGCAGCCTGTTTCATGGCAAATCCCCTGCTG<br/> TGGTGGAATCCTGAACGTCTTAATTCATGAAGAGGCAAAAAGTAAAGGCTGCTCAGTC<br/> TCTCTGTTCTCGGAAAACAACCTTGACAACCGAGAACCCTCGTCGGCCTAAGCCACTT<br/> AACCTTTAGTCAGTCTGCTCACCCGTTCTTCTGCAAAGGTTTTAACTTGTTTAACTTT<br/> AAATTTCTCAGCTGTTACAGTAAGCATATCCCTGACTCAAAGAAGTTGATGTGTTTG<br/> CTGGAAGATCAGGTGAGGACATGCGAAAACACGTTTCAGCTTATACCAGCCTCCAGCT<br/> CGCTGCTTTATCCAGATTCTGCATGAAATGCTGGTGATGTTGTCAACGATGCTGAGAT<br/> ATAAGCCATTGAATTCAGTGTGGTCCCATTACAACGAATGTTGAAAACAAAATGAG<br/> AAAGAAAACACAGACATTCTCAGAAATTCATCTGAGGAAATGAAAATTATGAAAAATC<br/> ATAGAAACATTCATACGTACATAATATACACAGTAACATCACTGTTTTATTTCAAATG<br/> TAGAAGAAAAAAAACCTTCTGATAACTGAAGAGAGACGTCACTTTAAATCATCTACTGG<br/> CTTGATGAAGGCTTGTTAACTGTTAAACACACACTTTCAGCGATGGAAGCACGAGAG<br/> GAACTCCTAAAAATATCTTCAGGTAGGGGGTAGTGAGGTCAGAGAAAATCTCTGGGG<br/> AAGTATTTAGGCCTATTAAGGATGGGCTTGATCTCTGCAACACCTACTGTAGCTGCGA<br/> CAGCTCTGGTTTTTCCAGCTGGCAAAGCAGAATTGACCTCCCCTTTGGACTTTATCTC<br/> CCAAATGATCCAAATATTGGAGCATATCTAACACTAAAGCTCGTCTAATGAGAGCATC<br/> ATGGGAGCGGATGGTTAAAGAGCGCTCGTTTCAGTAATGATCTTTGCTGAGTAAATTA<br/> AATCAAAGTGAGACCTCTGCTTGATTTTGGACCAATAGATTGATAGTTTTAGAGAAA<br/> ATCTAAAATAAATTCAAACGTGAAATCTCAAACAGCAATCAAACATGTTAAATAAAG<br/> AAAATGCATCTTTGTTTTATTTTCATCAGCACTTTCTATTTCTAAAACAGTTGTTCCAAA<br/> TTAGACGCCTCATTGTATGCAACTATTTAATGTACAGTGTGTAGCCATTCAAGTCCATC<br/> CCTGTCTTTTCTCCGTGTTATGTCTGTAATGAAGGGATTAACGAAAACCTCCACACAA<br/> GCCATTATCTTTAGACAATAGATTTGTTGAAAGGAAGTTTTGTTGAGGCTTCATTAGC<br/> AATGGCCTCCCTCTGTGGTCTGAAAGCAGGACACATTTGGAGCAATTAAGTACCAGAA<br/> AAACAACGTGAGTCACTTTAAAGGGGAAGGATTCCAATTAATAAACCTCTTAAACC<br/> CTCAGGTTTTACTACATTCCAGCAGCCTGCTCTGGTGTCTCTTGTGGTTAAGAGGAGT<br/> TTTGTCCGCAGAGGAGGACATTGCATGTTCTGGTTGCAACGATCTTTTGTCTCAGTTATT<br/> TGAAAGGAGCTTTAAGGATTTACGGCGAGCAACAAGTGTTCAGAGTAGACTGCA<br/> GTTGGTCTACTTATGGACGATGTGAGGAGTAGACCGTCAAGAAACCTGAACGAAGG<br/> TAAGACGGTTACATGTTTTGCATTTCTCAGTTACATGTTGGATGTGCTTTCTATCAT<br/> CCATGTGGGAAATGGGAACGTTGTTTCATGAAAATCTGTTTTATAGTTTCTCTCACACA<br/> GAGACCTTTTTGTAGAAGACAAATAATAAATTCTCTGATCTCACTAAGTCATGCTGAG<br/> ATACAATTACAACCTATAAAGCATATTTCTGCACACTTCAAACAAGAGATACAGGGGA<br/> AAAAACGCACATTCTCCTGAAACTTTTTTCTAAAGCATGTCAAACGTAGAAGCGTT</p> |

ATCCAGGGAAGGGAGATTAAGCAAAGGAAACTGACAGGCATGTGGATTAAGAACA  
AAGGGTGCAGGCCAGGCAACAGCAGGTTATTCATGAGCTACAAAAAACTGCTCAA  
CCAGTTTTGATTTCAAACCTTCTCTGAATAAATATCTTTTGTGGTAGTGGATGTGG  
AGATCGTTTTTAATGATGTCTGTGCGAACTTCTCTATAAAAGTACTTACACTGAAGTT  
GTGGTGTGCAGTTTTACAGTTTTGTGTTTTAATGTTTTGCAGAGAAAGATGTGAGTCA  
TCTCTGTGGACAAAACCTGCTGAGGTCTGCTCTTCTGTTCCAGAGGCACAAGA  
ATTTGTTGATCATCTCAGTTGGTAGACTTTGACTTTTTTTGACAAGAATCAGAAAGTG  
AGTCCAAAGGCAAGTCCAGGCCACCATGGCACCCAAGAAGAAGAGGAAGATGAAAG  
CGTTAACGGCCAGGCAACAAGAGGTGTTGATCTCATCCGTGATCACATCAGCCAGAC  
AGGTATGCCGCCGACGCGTGCAGAAATCGCGCAGCGTTTGGGGTCCGTTCCCAAA  
CGCGGCTGAAGAACATCTGAAGGCGTGGCACGCAAAGGCGTTATTGAAATTGTTTC  
CGCGCATCACGCGGGATTCTGTTGAGGAAGAGGAAGAAGGGTTGCCGCTGG  
TAGGTCGTGTGGCTGCCGGTGAACCGTCGAGCGCCGGTACCGAATCCCGGGTGTG  
ACCAGAAAAAGTTCAATAAAGTCAGAGTTGTGAGAGCACTGGATGCTGTTGCTCTCC  
ACAGCCAGTGGGCGTTCCAAATGAAAGCCAAGCCCTAAGCCAGAGATCACTTTTTCA  
CCAGGTCAAGACATACAGTTGATTCCACCACTGATCAACCTGTTAATGAGCATTGAAC  
CAGATGTGATCTATGCAGGACATGACAACACAAAACCTGACACCTCCAGTTCTTTGCT  
GACAAGTCTTAATCAACTAGGCGAGAGGCAACTTCTTTCAGTAGTCAAGTGGTCTAAA  
TCATTGCCAGGTTTTCGAACTTACATATTGATGACCAGATAACTCTCATTGATTTCC  
TTGGATGAGCTTAATGGTGTGGTCTAGGATGGAGATCTACAAACACGTCAGTGG  
GCAGATGCTGTATTTGACCTGATCTAATACTAAATGAACAGCGGATGAAAGAATCA  
TCATTCTATTATTATGCCTTACCATGTGGCAGATCCACAGGAGTTTGTCAAGCTTCA  
AGTTAGCCAAGAAGAGTTCCTCTGTATGAAAGTATTGTTACTTCTTAATACAATTCCT  
TGGAAGGGCTACGAAGTCAAACCCAGTTGAGGAGATGAGGTCAAGCTACATTAGAG  
AGCTCATCAAGGCAATTGGTTTGGAGGCAAAAAGGAGTTGTGTGCGAGCTCACAGCGTT  
TCTATCAACTTACAAAACCTTCTGATAACTTGCATGATCTTGTCAAACAACCTCATCTGT  
ACTGCTTGAATACATTTATCCAGTCCCGGGCACTGAGTGTGAAATTTCCAGAAATGAT  
GTCTGAAGTTATTGCTGGGTCGACGCCCATGGAATTCAGTACCTGCCAGATACAGAC  
GATCGTCACCGGATTGAGGAGAAACGTAAGGACATATGAGACCTTCAAGAGCATC  
ATGAAGAAGAGTCTTTTACGCGGACCCACCGACCCCGCCCTCCACCTCGACGCATTG  
CTGTGCCTTCCCGCAGCTCAGCTTCTGTCCCAAGCCAGCACCCAGCCCTATCCCTT  
ACGTCATCCCTGAGCACCATCAACTATGATGAGTTTCCACCATGGTGTTCCTTCTGG  
GCAGATCAGCCAGGCTCGGCCCTGGCCCCGGCCCCCTCCCAAGTCTGCCCCAGGCT  
CCAGCCCCTGCCCTGCTCCAGCCATGGTATCAGCTCTGGCCAGGCCCCAGCCCCTG  
TCCCAGTCTAGCCCCAGGCCCTCCTCAGGCTGTGGCCCCACCTGCCCCCAAGCCCAC  
CCAGGCTGGGGAAGGAACGCTGTGAGAGGCCCTGCTGCAGCTGCAGTTTGTGATGATGA  
AGACCTGGGGGCCTTGCTTGGCAACAGCACAGACCCAGCTGTGTTACAGACCTGGC  
ATCCGTCGACAACCTCGAGTTTTCAGCAGCTGCTGAACCAGGGCATACTGTGGCCCC  
CACACAACCTGAGCCCATGCTGATGGAGTACCCTGAGGCTATAACTCGCCTAGTGACAG  
GGGCCAGAGGCCCCCCGACCCAGCTCCTGCTCCACTGGGGGCCCGGGGCTCCCA  
ATGGCCTCCTTTCAGGAGATGAAGACTTCTCCTCATTGCGGACATGGACTTCTCAGC  
CCTGCTGAGTCAGATCAGCTCCTAAGGCGGCCGCGGACTCTAGATCATAATCAGC  
CATAACCACATTTGTAGAGGTTTTACTTGCTTTAAAAAACCTCCACACCTCCCCCTGAA  
CCTGAAACATAAAATGAATGCAATTGTTGTTGTTAACTGTTTATTGCAGCTTATAATG  
GTTACAAATAAAGCAATAGCATCACAATTTACAAATAAAGCATTTTTTTTCACTGCAT  
TCTAGTTGTGGTTTGTCCAAACTCATCAATGTATCTTAAGTTTAAACCGTTAACAATT  
GGAAATTAAGATTGAATCCTGTTGCCGGTCTTGCAGTATTATCATATAATTTCTGTTG  
AATTACGTTAAGCATGTAATAATTAACATGTAATGCATGACGTTATTTATGAGATGGG  
TTTTTATGATTAGAGTCCCGCAATTATACATTTAATACGCGATAGAAAACAAATATAG  
CGCGCAAACCTAGGATAAATTATCGCGCGGGTGTATCTATGTTACTAGATCGGGAAT  
TGATCCCCCTCGACAGCTTGCATGCCGCTTGGGCTGCAGGTGAGGCTAAAAACTA  
ATCGCATTATCATCCCTCGACGTAAGTGTACATATAACCACTGGTTTTATATACAGCAG  
TACTGTACATATAACCACTGGTTTTATATACAGCAGTCGACGTAAGTGTACATATAACCA

CTGGTTTTATATACAGCAGTACTGTACATATAACCACTGGTTTTATATACAGCAGTCGA  
GGTAAGATTAGATATGGATATGTATATGGATATGTATATGGTGGTAATGCCATGTAAT  
ATGCTCGACTCTAGGATCTTCGCAAGACCCTCCTCTATATAAGGAAGTTCATTTTATT  
TGGAGAGGACACGCTGAAGCTAGTCTGACTCTAGCCTCGAATTCTGCAGTCGACGGTA  
CCGGGGAATACAAGCTACTTGTCTTTTTGCAGATATCGAATTCAAGGAGCTTGCCGC  
CACCATGGTGAGCAAGGGCGAGGAGCTGTTACCGGGGTGGTGCCCATCTGGTCTG  
AGCTGGACGGCGACGTAACCGGCCACAAGTTCAGCGTGTCCGGCGAGGGCGAGGGC  
GATGCCACCTACGGCAAGCTGACCCTGAAGTTCATCTGCACCACCGGCAAGCTGCCCG  
TGCCCTGGCCACCCTCGTGACCACCTCACCTACGGCGTGCAGTGCTTCAGCCGCTA  
CCCCGACCACATGAAGCAGCAGACTTCTTCAAGTCCGCCATGCCCGAAGGCTACGTC  
CAGGAGCGACCATCTTCTTCAAGGACGACGGCAACTACAAGACCCGCGCCGAGGTG  
AAGTTCGAGGGCGACACCCTGGTGAACCGCATCGAGCTGAAGGGCATCGACTTCAAG  
GAGGACGGCAACATCCTGGGGCACAAGCTGGAGTACAACACAACAGCCACAACGTC  
TATATCATGGCCGACAAGCAGAAGAACGGCATCAAGGTGAATTCAGATCCGCCAC  
AACATCGAGGACGGCAGCGTGCAGCTCGCCGACCACTACCAGCAGAACACCCCATC  
GGCGACGGCCCCGTGCTGCTGCCCGACAACCACTACCTGAGCACCCAGTCCGCCCTG  
AGCAAAGACCCCAACGAGAAGCGCGATCACATGGTCTGCTGGAGTTCGTGACCGCC  
GCCGGGATCACTCTCGGCATGGACGAGCTGTACAAGTAAAGCGGCCGCGACTCTAGA  
ACTATAGTGAGTCGTATTACGTAGATCCAGACATGATAAGATACATTGATGAGTTTGG  
ACAAACCACAACACTAGAATGCAGTGAAAAAATGCTTTATTTGTGAAATTTGTGATGCT  
ATTGCTTTATTTGTAACCATTATAAGCTGCAATAAACAAGTTAACAAACAATTGCAT  
TCATTTTATGTTTCAGGTTTCAGGGGGAGGTGTGGGAGGTTTTTAAATTCGCGGCCGGG  
GGGGTGGAGCTCCAGCTTTTGTCCCTTTAGTGAGGGTTAATTGCGCGCATTACCTG  
TTATCCCTACGCGCTTGGCGTAATCATGGTCATAGCTGTTTCTGTGTGAAATTTGTTAT  
CCGCTCACAATTCACACAACATACGAGCCGGAAGCATAAAGTGTAAGCCTGGGGT  
GCCTAATGAGTGAGCTAACTCACATTAATTGCGTTGCGCTCACTGCCCGCTTTCCAGTC  
GGGAAACCTGTCGTGCCAGCTGCATTAATGAATCGGCCAACGCGCGGGGAGAGGCG  
GTTTGCATATTGGGCGCTCTCCGCTTCTCGCTCACTGACTCGTGCCTCGGTGCTT  
CGGCTGCGGCGAGCGGTATCAGCTCACTCAAAGGCGGTAATACGGTTATCCACAGAA  
TCAGGGGATAACGCAGGAAAGAACATGTGAGCAAAAGGCCAGCAAAAGGCCAGGA  
ACCGTAAAAAGGCCGCGTTGCTGGCGTTTTTCCATAGGCTCGGCCCCCTGACGAGCA  
TCACAAAAATCGACGCTCAAGTCAGAGGTGGCGAAACCCGACAGGACTATAAAGATA  
CCAGGCGTTCCCCCTGGAAGCTCCCTCGTGCCTCTCCTGTTCCGACCCTGCCGCTTA  
CCGGATACCTGTCGCTTTCTCCCTTCGGGAAGCGTGGCGCTTTCTCAATGCTCACGC  
TGTAGGTATCTCAGTTCGGTGTAGGTCGTTGCTCCAAGCTGGGCTGTGTGCACGAAC  
CCCCGTTCCAGCCGACCGCTGCGCTTATCCGGTAACTATCGTCTTGAGTCCAACCCG  
GTAAGACACGACTTATCGCCACTGGCAGCAGCCACTGGTAACAGGATTAGCAGAGCG  
AGGTATGTAGGCGGTGCTACAGAGTCTTGAAGTGGTGGCCTAACTACGGCTACACT  
AGAAGGACAGTATTTGGTATCTGCGCTCTGCTGAAGCCAGTTACCTTCGAAAAAGA  
GTTGGTAGCTCTTGATCCGGCAAACAACCACCGCTGGTAGCGGTGGTTTTTTTGT  
GCAAGCAGCAGATTACGCGCAGAAAAAAGGATCTCAAGAAGATCCTTTGATCTTTTC  
TACGGGGTCTGACGCTCAGTGAACGAAAACCTCACGTTAAGGGATTTTGGTCATGAG  
ATTATCAAAAAGGATCTTCACCTAGATCCTTTTAAATTAATAAAGTAAAAATCAA  
TCTAAAGTATATATGAGTAACTTGGTCTGACAGTTACCAATGCTTAATCAGTGAGGC  
ACCTATCTCAGCGATCTGTCTATTTGTTTCATCCATAGTTGCTGACTGCCCGTCTGT  
AGATAACTACGATACGGGAGGGCTTACCATCTGGCCCCAGTGTGCAATGATACCGC  
GAGACCCACGCTCACCGGCTCCAGATTTATCAGCAATAAACCAGCCAGCCGGAAGGG  
CCGAGCGCAGAAGTGGTCTGCAACTTTATCCGCTCCATCCAGTCTATTAATTGTTGC  
CGGGAAGCTAGAGTAAGTAGTTCGCCAGTTAATAGTTTGCGCAACGTTGTTGCCATTG  
CTACAGGCATCGTGGTGTACGCTCGTCTGTTGGTATGGCTTCATTAGCTCCGGTTCC  
CAACGATCAAGGGCAGTTACATGATCCCCATGTTGTGAAAAAAGCGGTTAGCTCCT  
TCGGTCTCCGATCGTTGTCAGAAGTAAGTTGGCCGAGTGTATCACTCATGCTTAT  
GGCAGCACTGCATAATTCTTACTGTCATGCCATCCGTAAGATGCTTTTCTGTGACTG

|                                          |                                                                                                                                                                                                                                                                                                                                                                                                                                                                                                                                                                                                                                                                                                                                                                                                                                                                                                                                                                                                                                                                                                                                                                                                                                                                                                                                                                                                                                                                                                                                                                                                                                                                                                                                                                                                                                                                                                                                                                                                                                                                                                                                                                                                                                                                                                                                                                                                                                                                                                                                                                                                                                                                                                                                                                                                                                                                                                                                                                                                                                                                                                                                                                                                                                                                                                                             |
|------------------------------------------|-----------------------------------------------------------------------------------------------------------------------------------------------------------------------------------------------------------------------------------------------------------------------------------------------------------------------------------------------------------------------------------------------------------------------------------------------------------------------------------------------------------------------------------------------------------------------------------------------------------------------------------------------------------------------------------------------------------------------------------------------------------------------------------------------------------------------------------------------------------------------------------------------------------------------------------------------------------------------------------------------------------------------------------------------------------------------------------------------------------------------------------------------------------------------------------------------------------------------------------------------------------------------------------------------------------------------------------------------------------------------------------------------------------------------------------------------------------------------------------------------------------------------------------------------------------------------------------------------------------------------------------------------------------------------------------------------------------------------------------------------------------------------------------------------------------------------------------------------------------------------------------------------------------------------------------------------------------------------------------------------------------------------------------------------------------------------------------------------------------------------------------------------------------------------------------------------------------------------------------------------------------------------------------------------------------------------------------------------------------------------------------------------------------------------------------------------------------------------------------------------------------------------------------------------------------------------------------------------------------------------------------------------------------------------------------------------------------------------------------------------------------------------------------------------------------------------------------------------------------------------------------------------------------------------------------------------------------------------------------------------------------------------------------------------------------------------------------------------------------------------------------------------------------------------------------------------------------------------------------------------------------------------------------------------------------------------------|
|                                          | <p>GTGAGTACTCAACCAAGTCATTCTGAGAATAGTGTATGCGGCGACCGAGTTGCTCTTG<br/>         CCCGGCGTCAATACGGGATAATACCGCGCCACATAGCAGAACTTTAAAGTGCTCATC<br/>         ATTGGAACGTTCTTCGGGGCGAAAACCTCAAGGATCTTACCGCTGTTGAGATCCA<br/>         GTTCGATGTAACCCACTCGTGCACCCAAGTCTTACGATCTTTACTTTACCCAGC<br/>         GTTTCTGGGTGAGCAAAAACAGGAAGGCAAAATGCCGCAAAAAGGGAATAAGGGC<br/>         GACACGGAAATGTTGAATACTCATACTCTTCTTTTTCAATATTATTGAAGCATTATCA<br/>         GGGTTATTGTCTCATGAGCGGATACATATTTGAATGTATTTAGAAAAATAAACAAATA<br/>         GGGGTTCCGCGCACATTTCCCCGAAAAGTGCCACCTG</p>                                                                                                                                                                                                                                                                                                                                                                                                                                                                                                                                                                                                                                                                                                                                                                                                                                                                                                                                                                                                                                                                                                                                                                                                                                                                                                                                                                                                                                                                                                                                                                                                                                                                                                                                                                                                                                                                                                                                                                                                                                                                                                                                                                                                                                                                                                                                                                                                                                                                                                                                                                                                                                                                                                                                                                   |
| <p>rx2::LexPR<br/>         OP::atoh7</p> | <p>AAATTGTAAACGTTAATATTTTGTAAAATTGCGGTTAAATTTTTGTTAAATCAGCTCAT<br/>         TTTTAAACCAATAGGCCGAAATCGGCAAAATCCCTTATAAATCAAAGAATAGACCGA<br/>         GATAGGGTTGAGTGTGTTCCAGTTTGAACAAGAGTCCACTATTAAGAACGTGGA<br/>         CTCCAACGTCAAAGGGCGAAAACCGTCTATCAGGGCGATGGCCACTACGTGAACC<br/>         ATCACCTAATCAAGTTTTTGGGGTCGAGGTGCCGTAAAGCACTAAATCGGAACCCT<br/>         AAAGGGAGCCCCGATTTAGAGCTTGACGGGGAAAGCCGGCGAACGTGGCGAGAAA<br/>         GGAAGGGAAGAAAGCGAAAGGAGCGGGCGCTAGGGCGCTGGCAAGTGTAGCGGTC<br/>         ACGCTGCGCGTAACCACCACACCCGCGCGCTTAATGCGCCGCTACAGGGCGCGTCC<br/>         CATTGCGCATTGAGGCTGCGCAACTGTTGGGAAGGGCGATCGGTGCGGGCCTCTTCG<br/>         CTATTACGCCAGCTGGCGAAAGGGGGATGTGCTGCAAGGCGATTAAGTTGGGTAAC<br/>         GCCAGGGTTTTCCAGTCACGACGTTGTAACGACGGCCAGTGAGCGCGTAGGGAT<br/>         AACAGGGTAATGCGCGGTAATACGACTCACTATAGGGCGAATTGGGTACCGCTGCA<br/>         CCGACTTTCTTCATGGTGACCATATGCGCAGCAGCCTGTTTCATGGCAAATCCCCTGCTG<br/>         TGGTGAATCCTGAACGCTTTAATTCATGAAGAGGCAAAAGTAAAGGCTGCTCAGTC<br/>         TCTCTGTTCTCGGAAAACAACTCTGACAACCGAGAACCCTCGTCGGCCTAAGCCACTT<br/>         AACCTTAGTCAGTCTGCTCACCCGTTCTTGCAAAGGTTTTAACTTGTTTAAACATTT<br/>         AAATTTCTCAGCTGCTTACAGTAAGCATATCCCTGACTCAAAGAAGTTGATGTGTTTG<br/>         CTGGAAGATCAGGTGAGGACATGCGAAAACACGTTGAGCTTATACCAGCCTCCAGCT<br/>         CGCTGCTTTATCCAGATTCTGCATGAAATGCTGGTGATGTTGTCAACGATGCTGAGAT<br/>         ATAAGCCATTGAATCCACTGTGGTCCCATTACAACGAATGTTGAAAACAAAATGAG<br/>         AAAGAAAACACAGACATTCTCAGAAATTCATCTGAGGAAATGAAAATTATGAAAAATC<br/>         ATAGAAACATTCATACGTCACATAATATACACAGTAACATCACTGTTTTATTTCAAATG<br/>         TAGAAGAAAAAAACCTTCTGATAACTGAAGAGAGACGTCACTTTAAATCATCTACTGG<br/>         CTTGATGAAGGCTTGTTAACTGTTAAACACACACTTTCAGCGATGGAAGCACGAGAG<br/>         GAACTCCTAAAAATATCTTCAGGTAGGGGGTAGTGAGGTCAGAGAAAATCTCTGGGG<br/>         AAGTATTTAGGCCTATTAAGGATGGGCTTGATCTCTGCAACACCTACTGTAGCTGCGA<br/>         CAGCTCTGGTTTTTCCAGCTGGCAAAGCAGAATTGACCTCCACTTTGGACTTTATCTC<br/>         CCAAATGATCCAAATATTGGAGCATATCTAACACTAAAGCTCGTCTAATGAGAGCATC<br/>         ATGGGAGCGGATGGTTAAAGAGCGCTCGTTGAGTAATGATCTTTGCTTGAGTAAATTA<br/>         AATCAAAGTGAGACCTCTGCTTGATTTTGGACCAATAGATTGATAGTTTTAGAGAAA<br/>         ATCTAAAATAAATCAAACGTGAAATCTCAAACAGCAATCAAACATGTTAAATAAAG<br/>         AAAATGCATCTTTGTTTTATTTATCAGCACTTTCTATTTCTAAAACAGTTGTTTCCAAA<br/>         TTAGACGCCTCATTGTATGCAACTATTTAATGTACAGTGTGTAGCCATTCAAGTCCATC<br/>         CCTGTCTTTTCTCCGTGTTATGTCTGTAATGAAGGGATTAACGAAAACCTCCACACAA<br/>         GCCATTATCTTTAGACAATAGATTTGTTGAAAGGAAGTTTTGTTGAGGCTTCATTAGC<br/>         AATGGCCTCCCTCTGTGGTCTGAAAGCAGGACACATTTGGAGCAATTAAGTACCAGG<br/>         AAACAAGTGCAGTCATTCTTAAAGGGGAAGGATTCCAATTAATAAACCTCTTAAACC<br/>         CTCAGGTTTTACTACCATTCCAGCAGCCTGCTCTGGTGTCTCTTGTGGTTAAGAGGAGT<br/>         TTTGTCGGCAGAGGAGGACATTGCATGTTCTGGTTGCAACGATCTTTGCTCAGTTATT<br/>         TGAAAGGAGCTTTAAGGATTTACGGCGAGCAACAAGTGTTCAGAGTAGACACTGCA<br/>         GTTGGTTCTACTTATGGACGATGTGAGGAGTAGACCGTCAAGAAACCTGAACGAAGG<br/>         TAAGACGGTTACATGTTTTGCATTTCTCAGTTACATGTTTGGATGTGCTTTCTATCAT<br/>         CCATGTGGGAAATGGGAACGTTGTTTCATGAAAATCTGTTTTATAGTTTCTCTCACACA<br/>         GAGACCTTTTTGTAGAAGACAATAATAAATCTCTGATCTACTAAGTCATGCTGAG<br/>         ATACAATTACAACCTATAAAGCATATTTCTGCACACTTCCAACAAGAGATACAGGGGA</p> |

AAAAACGCACATTCTTCTGAAACTTTTTCTAAAGCATGTCAAAACGTAGAAGCGTT  
ATCCAGGGAAAGGGAGATTAAGCAAAGGAAACTGACAGGCATGTGGATTAAGAACA  
AAGGGTGCAGGCCAGGCAACAGCAGTTATTATGAGCTACAAAAAAACTGCTCAA  
CCAGTTTTGATTTCAAACCTTCTCTGAATAAATATCTTTTGGTTGGTAGTGGATGTGG  
AGATCGTTTTAAATGATGTCTGTGCGAACTTCTATAAAAGTACTTACTACTGAAGTT  
GTGGTGTGCAGTTTTACAGTTTTGTGTTTTAATGTTTTGCAGAGAAAGATGTGAGTCA  
TCTCTGTGGACAAAACCTGCTGAGGTCTGCTCTTCTGTTCCAGAGGCACAAGAACT  
ATTTGTTGATCATCTCAGTTGGTAGACTTTGACTTTTTTTGACAAGAATCAGAAAGTG  
AGTCCAAAGGCAAGTCCAGGCCACCATGGCACCCAAGAAGAAGAGGAAGATGAAAG  
CGTTAACGGCCAGGCAACAAGAGGTGTTGATCTCATCCGTGATCACATCAGCCAGAC  
AGGTATGCCGCCGACGCGTGCAGGAAATCGCGCAGCGTTTGGGGTCCGTTCCCAAA  
CGCGGCTGAAGAACATCTGAAGGCGCTGGCACGCAAAGCGTTATTGAAATTGTTTC  
CGGCGCATCACGCGGGATTCTGTCTGTTGCAGGAAGAGGAAGAAGGGTTGCCGCTGG  
TAGGTCGTGTGGCTGCCGGTGAACCGTCGAGCGCCGTACCGAATCCCGGGTGTCCG  
ACCAGAAAAGTTCAATAAAGTCAGAGTTGTGAGAGCACTGGATGCTGTTGCTCTCCC  
ACAGCCAGTGGGCGTTCCAAATGAAAGCCAAGCCCTAAGCCAGAGATTCACTTTTTCA  
CCAGGTCAAGACATACAGTTGATTCCACCACTGATCAACCTGTTAATGAGCATTGAAC  
CAGATGTGATCTATGCAGGACATGACAACACAAAACCTGACACCTCCAGTTCTTTGCT  
GACAAGTCTTAATCAACTAGGCGAGAGGCAACTTCTTTCAGTAGTCAAGTGGTCTAAA  
TCATTGCCAGGTTTTCGAACTTACATATTGATGACCAGATAACTCTCATTGATTTCC  
TTGGATGAGCTTAATGGTGTGGTCTAGGATGGAGATCCTACAAACACGTCAGTGG  
GCAGATGCTGTATTTGCACCTGATCTAATACTAAATGAACAGCGGATGAAAGAATCA  
TCATTCTATTATTGCCTTACCATGTGGCAGATCCCACAGGAGTTTGTCAAGCTTCA  
AGTTAGCCAAGAAGAGTTCCTCTGTATGAAAGTATTGTTACTTCTTAATACAATTCCT  
TGGAAGGGCTACGAAGTCAAACCCAGTTTGGAGGAGATGAGGTCAAGCTACATTAGAG  
AGCTCATCAAGGCAATTGGTTTGGAGGCAAAAAGGAGTTGTGTGCGAGCTCACAGCGTT  
TCTATCAACTTACAAAACCTTGTGATAACTTGCATGATCTTGTCAAACAACCTCATCTGT  
ACTGCTTGAATACATTTATCCAGTCCCAGGCACTGAGTGTGAAATTTCCAGAAATGAT  
GTCTGAAGTTATTGCTGGGTGACGCCCATGGAATTCCAGTACCTGCCAGATACAGAC  
GATCGTCACCGGATTGAGGAGAAACGTAAGGACATATGAGACCTTCAAGAGCATC  
ATGAAGAAGAGTCCTTTCAGCGGACCCACCGACCCCGGCTCCACCTCGACGCATTG  
CTGTGCCTTCCCGCAGCTCAGCTTCTGTCCCAAGCCAGCACCCAGCCCTATCCCTTT  
ACGTCATCCCTGAGCACCATCAACTATGATGAGTTTCCACCATGGTGTTCCTTCTGG  
GCAGATCAGCCAGGCCTCGGCCCTGGCCCCGCCCCCTCCCAAGTCTGCCCCAGGCT  
CCAGCCCCTGCCCTGCTCCAGCCATGGTATCAGCTCTGGCCAGGCCCCAGCCCCTG  
TCCCAGTCTAGCCCCAGGCCCTCCTCAGGCTGTGGCCCCACCTGCCCAAGCCCAC  
CCAGGCTGGGGAAGGAACGCTGTGAGAGGCCCTGCTGCAGCTGCAGTTTGTGATGA  
AGACCTGGGGCCTTGCTTGGCAACAGCACAGACCCAGCTGTGTTACAGACCTGGC  
ATCCGTGCAACTCCGAGTTTCAGCAGCTGCTGAACCAGGGCATACTGTGGCCCC  
CACACAACCTGAGCCCATGCTGATGGAGTACCCTGAGGCTATAACTCGCCTAGTGACAG  
GGGCCAGAGGCCCCCGACCCAGCTCCTGCTCCACTGGGGGCCCCGGGGCTCCCA  
ATGGCCTCCTTTCAGGAGATGAAGACTTCTCCTCATTGCGGACATGGACTTCTCAGC  
CCTGCTGAGTCAGATCAGCTCCTAAGGCGGCCGCGGACTCTAGATCATAATCAGC  
CATAACCATTTGTAGAGGTTTTACTTGCTTTAAAAAACCTCCACACCTCCCCTGAA  
CCTGAAACATAAAATGAATGCAATTGTTGTTGTTAACTGTTTATTGCAGCTTATAATG  
GTTACAAATAAAGCAATAGCATCACAATTTACAAATAAAGCATTTTTTTACTGCAT  
TCTAGTTGTGGTTTGTCCAACTCATCAATGTATCTTAAGTTTAAACGCGTTAACAATT  
GGAAATTAAGATTGAATCCTGTTGCCGGTCTTGCAGTATTATCATATAATTTCTGTTG  
AATTACGTTAAGCATGTAATAATTAACATGTAATGCATGACGTTATTTATGAGATGGG  
TTTTATGATTAGAGTCCCGAATTATACATTTAATACGCGATAGAAAACAAATATAG  
CGCGCAAACCTAGGATAAATTATCGCGCGGGTGTCTATCTATGTTACTAGATCGGGAAT  
TGATCCCCCTCGACAGCTTGCATGCCGCTTGGGCTGCAGGTGAGGCTAAAAACTA  
ATCGCATTATCATCCCTCGACGTAATGATACATAAACCCTGGTTTTATATACAGCAG

TACTGTACATATAACCACTGGTTTTATATACAGCAGTCGACGTACTGTACATATAACCA  
CTGGTTTTATATACAGCAGTACTGTACATATAACCACTGGTTTTATATACAGCAGTCGA  
GGTAAGATTAGATATGGATATGTATATGGATATGTATATGGTGGTAATGCCATGTAAT  
ATGCTCGACTCTAGGATCTTCGCAAGACCCTTCCTCTATATAAGGAAGTTCATTTTATT  
TGGAGAGGACACGCTGAAGCTAGTCGACTCTAGCCTCGAATTCTGCAGTCGACGGTA  
CCGGGGAATACAAGCTACTTGTCTTTTTGCAGATGTAGATCCAGACATGATAAGATA  
CATTGATGAGTTTGGACAAACCACAAGTGAATGCAGTGAATAAATGCTTTATTTGT  
GAAATTTGTGATGCTATTGCTTTATTTGTAACCATTATAAGCTGCAATAAACAAGTTAA  
CAACAACAATTGCATTCATTTTATGTTTCAGGTTTCAGGGGGAGGTGTGGGAGGTTTTT  
TAATTCGCGGCCAAGGCCGCGCCAGGATCCATCGATATCTGCAGAATTCGCCCTTACC  
GGGAGCTGTGACTGGCATCTGCTCCGACATCATCGGCTCCATCCGCTGAGGGCTTCGC  
CTCTTTGCACAGAAACCATGAAGTCCCGTCGACCCAGCTGCAGCGACTCCGGGTCCGA  
GTCCTCTGAGCCAGACTCCAAGAGCCCAGAGAAGTACGAGACCGCCACCAGGAGACG  
GATGGCCGCAACGCCAGAGAGAGGAAGAGGATGCAGGGTTTGAACACCGCCTTTG  
ATCGCCTACGGAAGGTGGTGCCGAGTGGGGCCAAGACAAAAAGCTGTCCAAGTAC  
GAAACCTGCAGATGGCCCTCAGCTACATCATGGCCCTGAGCCGGATCCTGACGGAC  
CCCCGGAGGCACGCTGCGCCCCACAGGCAGTGGCTGGACCTGCAGCTGGAGGCCGT  
GGAGCCCCAACCTTCTCCTGCCTCCTGGAGTACGACCAGCCAGGGCGCAGGACTA  
CGTCCACTCTGACTTCTACCAGTTTGGAGCCCCCAGCTCCACCTCTGAGGCTGCGGA  
CCGGCGTTCATGTTGGAAGTGAACGACAGCCGAAGGGCGAATTCCAGCACACTGGC  
GGCCGTTACTAGTAAGCGGCCGCGACTCTAGAACTATAGTGAGTCGTATTACGTAGAT  
CCAGACATGATAAGATACATTGATGAGTTTGGACAAACCACAAGTGAATGCAGTGA  
AAAAATGCTTTATTTGTGAAATTTGTGATGCTATTGCTTTATTTGTAACCATTATAAG  
CTGCAATAAACAAGTTAACAACAACAATTGCATTCATTTTATGTTTCAGGTTTCAGGGG  
GAGGTGTGGGAGGTTTTTTAATTCGCGGCCGGGGGGTGGAGCTCCAGCTTTTGTTC  
CCTTTAGTGAGGGTTAATTGCGCGCATTACCCTGTTATCCCTACGCGCTTGGCGTAATC  
ATGGTCATAGCTGTTTCTGTGTGAAATTGTTATCCGCTCACAATCCACACAACATAC  
GAGCCGGAAGCATAAAGTGTAAGCCTGGGGTGCTAATGAGTGAGCTAACTACAT  
TAATTGCGTTGCGCTCACTGCCCCGTTTTCCAGTCGGGAAACCTGTCGTGCCAGCTGCA  
TTAATGAATCGGCCAACGCGCGGGAGAGGCGGTTTTCGTATTGGGCGCTTCCCGC  
TTCTCGCTCACTGACTCGCTGCGCTCGGTCGTTTCGGCTGCGGCGAGCGGTATCAGCT  
CACTCAAAGGCGGTAATACGTTTATCCACAGAATCAGGGGATAACGCAGGAAAGAAC  
ATGTGAGCAAAGGCCAGCAAAGGCCAGGAACCGTAAAAAGGCCGCTTGTGTCG  
GTTTTTCCATAGGCTCGGCCCCCTGACGAGCATCAGAAAATCGACGCTCAAGTCAG  
AGGTGGCGAAACCCGACAGGACTATAAAGATACCAGGCGTTCCCCCTGGAAGCTCC  
CTCGTGCGCTCTCCTGTTCCGACCCTGCCGTTACCGGATACCTGTCCGCCTTTCTCCCT  
TCGGGAAGCGTGCGCTTTCTCAATGCTCACGCTGTAGGTATCTCAGTTTCGGTGTAGG  
TCGTTTCGCTCCAAGCTGGGCTGTGTGCACGAACCCCCCGTTTCAGCCCGACCCTGCGC  
CTTATCCGGTAACTATCGTCTTGAGTCCAACCCGGTAAGACACGACTTATCGCCACTG  
GCAGCAGCCACTGGTAACAGGATTAGCAGAGCGAGGTATGTAGGCGGTGCTACAGA  
GTTCTTGAAGTGGTGGCCTAACTACGGCTACACTAGAAGGACAGTATTTGGTATCTGC  
GCTCTGCTGAAGCCAGTTACCTTCGGAAAAAGAGTTGGTAGCTCTTGATCCGGCAAAC  
AAACCACCGCTGGTAGCGGTGGTTTTTTTTGTTTGAAGCAGCAGATTACGCGCAGAAA  
AAAAGGATCTCAAGAAGATCCTTTGATCTTTTCTACGGGTCTGACGCTCAGTGGAAC  
GAAAACCTCACGTTAAGGGATTTTGGTCATGAGATTATCAAAAAGGATCTTACCTAGA  
TCCTTTTAAATTAATAAATGAAGTTTTAAATCAATCTAAAGTATATATGAGTAACTTGG  
TCTGACAGTTACCAATGCTTAATCAGTGAGGCACCTATCTCAGCGATCTGTCTATTTTCG  
TTCATCCATAGTTGCCTGACTGCCGTCGTGTAGATAACTACGATACGGGAGGGCTTA  
CCATCTGGCCCCAGTGCTGCAATGATACCGCGAGACCCACGCTCACCGGCTCCAGATT  
TATCAGCAATAAACCAGCCAGCCGGAAGGGCCGAGCGCAGAAGTGGTCTGCAACTT  
TATCCGCCTCCATCCAGTCTATTAATTGTTGCCGGGAAGCTAGAGTAAGTAGTTCGCC  
AGTTAATAGTTTGCGCAACGTTGTTGCCATTGCTACAGGCATCGTGGTGTACGCTCG  
TCGTTTGGTATGGCTTCATTCAGCTCCGGTTCCAACGATCAAGGCGAGTTACATGAT

|                                        |                                                                                                                                                                                                                                                                                                                                                                                                                                                                                                                                                                                                                                                                                                                                                                                                                                                                                                                                                                                                                                                                                                                                                                                                                                                                                                                                                                                                                                                                                                                                                                                                                                                                                                                                                                                                                                                                                                                                                                                                                                                                                                                                                                                                                                                                                                                                                                                                                                                                                                                                                                                                                                                                                                                                                     |
|----------------------------------------|-----------------------------------------------------------------------------------------------------------------------------------------------------------------------------------------------------------------------------------------------------------------------------------------------------------------------------------------------------------------------------------------------------------------------------------------------------------------------------------------------------------------------------------------------------------------------------------------------------------------------------------------------------------------------------------------------------------------------------------------------------------------------------------------------------------------------------------------------------------------------------------------------------------------------------------------------------------------------------------------------------------------------------------------------------------------------------------------------------------------------------------------------------------------------------------------------------------------------------------------------------------------------------------------------------------------------------------------------------------------------------------------------------------------------------------------------------------------------------------------------------------------------------------------------------------------------------------------------------------------------------------------------------------------------------------------------------------------------------------------------------------------------------------------------------------------------------------------------------------------------------------------------------------------------------------------------------------------------------------------------------------------------------------------------------------------------------------------------------------------------------------------------------------------------------------------------------------------------------------------------------------------------------------------------------------------------------------------------------------------------------------------------------------------------------------------------------------------------------------------------------------------------------------------------------------------------------------------------------------------------------------------------------------------------------------------------------------------------------------------------------|
|                                        | <p>CCCCATGTTGTGAAAAAAGCGGTTAGCTCCTTCGGTCTCCGATCGTTGTCAGAAG<br/> TAAGTTGGCCGAGTGTTATCACTCATGCTTATGGCAGCACTGCATAATTCTTACTG<br/> TCATGCCATCCGTAAGATGCTTTTCTGTGACTGGTGAGTACTCAACCAAGTCATTCTGA<br/> GAATAGTGTATGCGGCGACCGAGTTGCTCTTGCCCGCGTCAATACGGGATAATACC<br/> GCGCCACATAGCAGAACCTTTAAAAGTGCTCATCATTGGAAAACGTTCTTCGGGGCGAA<br/> AACTCTCAAGGATCTTACCGCTGTTGAGATCCAGTTCGATGTAACCCACTCGTGCACCC<br/> AACTGATCTTACAGCATCTTTACTTTACCAGCGTTTCTGGGTGAGCAAAAACAGGAA<br/> GGCAAAATGCCGCAAAAAGGGAATAAGGGCGACACGGAAATGTTGAATACTCATA<br/> CTCTTCTTTTCAATATTATTGAAGCATTATCAGGGTTATTGTCTCATGAGCGGATAC<br/> ATATTTGAATGTATTTAGAAAAATAAACAAATAGGGGTTCCGCGCACATTTCCCGAA<br/> AAGTGCCACCTG</p>                                                                                                                                                                                                                                                                                                                                                                                                                                                                                                                                                                                                                                                                                                                                                                                                                                                                                                                                                                                                                                                                                                                                                                                                                                                                                                                                                                                                                                                                                                                                                                                                                                                                                                                                                                                                                                                                                                                                                                                                                                                                           |
| <p>cmlc2::ECFP<br/> OP::Lyn-Tomato</p> | <p>AAATTGTAAACGTTAATATTTTGTAAAATTGCGTTAAATTTTTGTAAATCAGCTCAT<br/> TTTTAAACCAATAGGCCGAAATCGGCAAAATCCCTTATAAATCAAAGAATAGACCGA<br/> GATAGGGTTGAGTGTGTTCCAGTTTGGAAACAAGAGTCCACTATTAAGAACGTGGA<br/> CTCCAACGTCAAAGGGCGAAAAACCGTCTATCAGGGCGATGGCCCACTACGTGAACC<br/> ATCACCTAATCAAGTTTTTGGGGTTCGAGGTGCCGTAAAGCACTAAATCGGAACCCT<br/> AAAGGGAGCCCCGATTTAGAGCTTGACGGGGAAAGCCGGCGAACGTGGCGAGAAA<br/> GGAAGGGAAAGAAAGCGAAAGGAGCGGGCGCTAGGGCGCTGGCAAGTGTAGCGGTC<br/> ACGCTGCGCGTAACCACCACACCCGCGCTTAATGCGCCGCTACAGGGCGCGTCC<br/> CATTGCGCATTAGGCTGCGCAACTGTTGGGAAGGGCGATCGGTGCGGGCCTCTTCG<br/> CTATTACGCCAGCTGGCGAAAGGGGGATGTGCTGCAAGGCGATTAAGTTGGGTAAC<br/> GCCAGGGTTTTCCAGTCACGACGTTGTA AACGACGGCCAGTGAGCGCGTAGGGAT<br/> AACAGGGTAATGCGCGCGTAATACGACTCACTATAGGGCGAATTGGGAGCTTAAATC<br/> AGTTGTGTTAAATAAGAGACATTCAAATAAATGTAATGAGCTCTCAAATCAGCAG<br/> ACTTAACATTCTTTAAAATGATTGATTCAATAGTGATAAAAATCAGGCATAGCCAGTTG<br/> TAACCTTAGATAAATTACAGAAAATGTCAAATACAGAGAACCGATTCTTTTTATGATA<br/> CATCCAAGCACACATTTAACACAATCCAGGCAAACCCCGAATTTACAGTCAACAAGCA<br/> CTGTTTGTACAAGAGCTTTCCTAAGGACACACAGTCTCTATAAGTCCAGGTCGTTGG<br/> TTCACTCTTATTTTAAACATGTGACATTTTTCTGCCATCCTGTCTTAGGCTGCTGTTT<br/> GCTTCATTCCATGTCACATTAATTCCTCAGTAGCACCTTTTACACACACAGCCAATCTT<br/> TTCCAGAAAATTCAATTGCTTTGAAGAGATAATGTGTGAACAAATCCATTTAGAAAAG<br/> GAAAATTAAGAATTTGTA AATCATCTGTAAATGTTGGCATTCTTCTGTATATGAACA<br/> TCACATCATTTACAGGTA AAGGTCTGGTCATTAATTATGACAATTTACTGGTATTAT<br/> TTTGTGAAAGGGGCTATTTTCAATGCGTTCATCCATCCTTTTCCATCCCTCAAATCTCTCA<br/> TTCACGTCCCCCTCCCATCTGCACACTTTATCTATTTTCCACCCTGCTGGAATCTGAG<br/> CACTTGTGCAGTTATCAGGGCTCCTGTATTTAGGAGGCTCTGGGTGTCATGTAGGGG<br/> ACGAACAGAAACACTGCAGACCTTTATAGAAGAACAATTGATAAGAGTCTCATACAT<br/> AAAGACTCCATTAGTAAGCCAGTGACCCAGGAGCCAGACCAACAGCAAAGCAGACA<br/> GTGACCATGGTGAGCAAGGGCGAGGAGCTGTTACCGGGGTGGTGCCATCCTGGT<br/> CGAGCTGGACGGCGACGTA AACGGCCACAAGTTCAGCGTGTCCGGCGAGGGCGAGG<br/> GCGATGCCACCTACGGCAAGCTGACCCTGAAGTTCATCTGCACCACCGGCAAGCTGCC<br/> CGTGCCCTGGCCACCCTCGTGACCACCCTGACCTGGGGCGTGAGTGCTTCAGCCGC<br/> TACCCCGACCACATGAAGCAGCACGACTTCTTCAAGTCCGCCATGCCCGAAGGCTACG<br/> TCCAGGAGCGACCATCTTCTTCAAGGACGACGGCAACTACAAGACCCGCGCCGAGG<br/> TGAAGTTCGAGGGCGACACCCTGGTGAACCGCATCGAGCTGAAGGGCATCGACTTCA<br/> AGGAGGACGGCAACATCCTGGGGACAAGCTGGAGTACA ACTACATCAGCCACAAC<br/> GTCTATATCACCGCCGACAAGCAGAAGAACGGCATCAAGGCCAACTTCAAGATCCGC<br/> CACAACATCGAGGACGGCAGCGTGACGCTCGCCGACCACTACCAGCAGAACACCCCC<br/> ATCGGCGACGGCCCCGTGCTGCTGCCGACAACCACTACCTGAGCACCCAGTCCGCCC<br/> TGAGCAAAGACCCCAACGAGAAGCGCGATCACATGGTCTGCTGGAGTTCGTGACCG<br/> CCGCCGGGATCACTCTCGGCATGGACGAGCTGTACAAGTAAAGCGGCCAAACCCGCT<br/> GATCAGCCTCGACTGTGCCTTCTAGTTGCCAGCCATCTGTTGTTTCCCTCCCCGCTG<br/> CCTTCTTGACCCTGGAAGGTGCCACTCCCACTGTCTTTCTTAATAAATGAGGAAAT</p> |

TGCATCGCATTGTCTGAGTAGGTGTCATTCTATTCTGGGGGGTGGGGTGGGGCAGGA  
CAGCAAGGGGGAGGATTGGGAAGACAATAGCAGGCATGCTGGGGATGCGGTGGGC  
TCTATGGCTTCTGAGGCGAAAGAACCAGCACGTGGCGCCTAGGCCGCCGATCGTCG  
ACTAGTTATAATTTAAATTAAGATTGAATCCTGTTGCCGGTCTTGCGATGATTATCATA  
TAATTTCTGTTGAATTACGTTAAGCATGTAATAATTAACATGTAATGCATGACGTTATT  
TATGAGATGGGTTTTATGATTAGAGTCCCACAATTATACATTTAATACGCGATAGAA  
AACAAAATATAGCGCGAAACTAGGATAAATTATCGCGCGCGGTGTCATCTATGTTAC  
TAGATCGGGAATTGATCCCCCTCGACAGCTTGCATGCCGCTTGGGCTGCAGGTGCGA  
GGCTAAAAAACTAATCGCATTATCATCCCCTCGACGACTGTACATATAACCACTGGTT  
TTATATACAGCAGTACTGTACATATAACCACTGGTTTTATATACAGCAGTCGACGACT  
GTACATATAACCACTGGTTTTATATACAGCAGTACTGTACATATAACCACTGGTTTTAT  
ATACAGCAGTCGAGGTAAGATTAGATATGGATATGTATATGGATATGTATATGGTGG  
TAATGCCATGTAATATGCTCGACTCTAGGATCTTCGCAAGACCCTTCTCTATATAAGG  
AAGTTCATTTCAATTTGGAGAGGACACGCTGAAGCTAGTCGACTCTAGCCTCGAATTCT  
GCAGTCGACGGCGATTGCAATCAAGGCCTCTCGAGCCTTAGAGCCACCATGGGCT  
GCATCAAGAGCAAGCGCAAGGACAACCTGAACGACGACGAGGCCGCCATGGGCTGC  
ATCAAGAGCAAGCGCAAGGACAACCTGAACGACGACGAGGCCACCGGAAGATCCCGC  
CACCATGGTGAGCAAGGGCGAGGAGGTCATCAAAGAGTTCATGCGCTTCAAGGTGC  
GCATGGAGGGCTCCATGAACGGCCACGAGTTCGAGATCGAGGGCGAGGGCGAGGG  
CCGCCCTACGAGGGCACCCAGACCGCCAAGCTGAAGGTGACCAAGGGCGGCCCCCT  
GCCCTTCGCTGGGACATCCTGTCCCCCAGTTCATGTACGGCTCCAAGGCGTACGTG  
AAGCACCCCGCCGACATCCCCGATTACAAGAAGCTGTCTTCCCCGAGGGCTTCAAGT  
GGGAGCGCGTGATGAACTTCGAGGACGGCGGTCTGGTGACCGTGACCCAGGACTCC  
TCCCTGCAGGACGGCACGCTGATCTACAAGGTGAAGATGCGCGGCACCAACTCCCC  
CCCGACGGCCCCGTAATGCAGAAGAAGACCATGGGCTGGGAGGCCTCCACCGAGCG  
CCTGTACCCCGCGACGGCGTGCTGAAGGGCGAGATCCACCAGGCCCTGAAGCTGAA  
GGACGGCGGCCACTACCTGGTGGAGTTCAGACCATCTACATGGCCAAGAAGCCCGT  
GCAACTGCCCGGCTACTACTACGTGGACACCAAGCTGGACATCACCTCCACAACGAG  
GACTACACCATCGTGGAACAGTACGAGCGCTCCGAGGGCCGCCACCACCTGTTCTG  
GGCATGGCACCGGCAGCACCGGCAGCGGCAGCTCCGGCACCGCCTCCTCCGAGGA  
CAACAACATGGCCGTATCAAAGAGTTCATGCGCTTCAAGGTGCGCATGGAGGGCTC  
CATGAACGGCCACGAGTTCGAGATCGAGGGCGAGGGCGAGGGCCGCCCTACGAGG  
GCACCCAGACCGCCAAGCTGAAGGTGACCAAGGGCGGCCCCCTGCCCTTCGCTGGG  
ACATCCTGTCCCCCAGTTCATGTACGGCTCCAAGGCGTACGTGAAGCACCCGCCGA  
CATCCCCGATTACAAGAAGCTGTCTTCCCCGAGGGCTTCAAGTGGGAGCGCGTGAT  
GAACTTCGAGGACGGCGGTCTGGTGACCGTGACCCAGGACTCCTCCTGCAGGACGG  
CACGCTGATCTACAAGGTGAAGATGCGCGGCACCAACTTCCCCCGACGGCCCCGTA  
ATGCAGAAGAAGACCATGGGCTGGGAGGCCTCCACCGAGCGCCTGTACCCCGCGAC  
GGCGTGCTGAAGGGCGAGATCCACCAGGCCCTGAAGCTGAAGGACGGCGGCCACTA  
CCTGGTGGAGTTCAGACCATCTACATGGCCAAGAAGCCCGTGAACCTGCCCGGCTA  
CTACTACGTGGACACCAAGCTGGACATCACCTCCACAACGAGGACTACACCATCGTG  
GAACAGTACGAGCGCTCCGAGGGCCGCCACCACCTGTTCTGTACGGCATGGACGAG  
CTGTACAAGTAATAAGAATTCGAAGCTGTAGATCCAGACATGATAAGATACATTGATG  
AGTTTGGACAAACCACAACACTAGAATGCAGTGAAAAAATGCTTTATTTGTGAAATTTG  
TGATGCTATTGCTTTATTTGTAACCATTATAAGCTGCAATAAACAAGTTAACAACA  
ATTGCATTCATTTATGTTTCAGGTTTCAGGGGAGGTGTGGGAGGTTTTTTAATTCGC  
GGCCGCCACCGCGGTGGAGCTCCAGCTTTTGTCCCTTATAGTGAGGGTTAATTGCGCG  
CATTACCCTGTTATCCCTACGCGCTTGGCGTAATCATGGTCATAGCTGTTTCTGTGTG  
AAATTGTTATCCGCTACAATTCCACACAACATACGAGCCGGAAGCATAAAGTGTA  
GCCTGGGGTGCCTAATGAGTGAGTAACTCACATTAATTGCGTTGCGCTCACTGCCCG  
CTTCCAGTCGGGAAACCTGTCGTGCCAGCTGCATTAATGAATCGGCCAACGCGCGG  
GGAGAGGCGGTTTTCGTATTGGGCGCTTCCGCTTCTCGCTCACTGACTCGCTGCG  
CTCGGTGCTTCGGCTGCGGCGAGCGGTATCAGCTCACTCAAAGGCGGTAATACGGTT



|                       |                                                                                                                                                                                                                                                                                                                                                                                                                                                                                                                                                                                                                                                                                                                                                                                                                                                                                                                                                                                                                                                                                                                                                                                                                                                                                                                                                                                                                                                                                                                                                                                                                                                                                                                                                                                                                                                                                                                                                                                                                                                                                                                                                                                                                                                                                                                                               |
|-----------------------|-----------------------------------------------------------------------------------------------------------------------------------------------------------------------------------------------------------------------------------------------------------------------------------------------------------------------------------------------------------------------------------------------------------------------------------------------------------------------------------------------------------------------------------------------------------------------------------------------------------------------------------------------------------------------------------------------------------------------------------------------------------------------------------------------------------------------------------------------------------------------------------------------------------------------------------------------------------------------------------------------------------------------------------------------------------------------------------------------------------------------------------------------------------------------------------------------------------------------------------------------------------------------------------------------------------------------------------------------------------------------------------------------------------------------------------------------------------------------------------------------------------------------------------------------------------------------------------------------------------------------------------------------------------------------------------------------------------------------------------------------------------------------------------------------------------------------------------------------------------------------------------------------------------------------------------------------------------------------------------------------------------------------------------------------------------------------------------------------------------------------------------------------------------------------------------------------------------------------------------------------------------------------------------------------------------------------------------------------|
|                       | <p>ATCCACAGAATCAGGGGATAACGCAGGAAAGAACATGTGAGCAAAGGCCAGCAA<br/>         AGGCCAGGAACCGTAAAAAGGCCGCGTTGCTGGCGTTTTTCCATAGGCTCGGCCCC<br/>         CTGACGAGCATCACAAAATCGACGCTCAAGTCAGAGGTGGCGAAACCCGACAGGAC<br/>         TATAAAGATAACCAGGCGTTCCCCCTGGAAGCTCCCTCGTGCGCTCTCCTGTTCCGACC<br/>         CTGCCGCTTACCGGATACCTGTCCGCCTTTCTCCCTTCGGGAAGCGTGGCGCTTTCTCA<br/>         ATGCTCACGCTGTAGGTATCTCAGTTCGGTGTAGGTCGTTGCTCCAAGCTGGGCTGT<br/>         GTGCACGAACCCCCGTTACGCCGACCGCTGCGCCTTATCCGGTAACTATCGTCTTG<br/>         AGTCCAACCCGGTAAGACACGACTTATCGCCACTGGCAGCAGCCACTGGTAACAGGA<br/>         TTAGCAGAGCGAGGTATGTAGGCGGTGCTACAGAGTTCCTGAAGTGGTGGCCTAACT<br/>         ACGGCTACACTAGAAGGACAGTATTTGGTATCTGCGCTCTGCTGAAGCCAGTTACCTT<br/>         CGGAAAAAGAGTTGGTAGCTCTTGATCCGGCAAACAACCACCGCTGGTAGCGGTGG<br/>         TTTTTTGTGTTGCAAGCAGCAGATTACGCGCAGAAAAAAGGATCTCAAGAAGATCCT<br/>         TTGATCTTTTCTACGGGGTCTGACGCTCAGTGGAACGAAAACCTCACGTTAAGGGATTT<br/>         TGGTCATGAGATTATCAAAAAGGATCTTACCTAGATCCTTTAAATAAAAATGAAGT<br/>         TTTAAATCAATCTAAAGTATATATGAGTAAACTTGGTCTGACAGTTACCAATGCTTAAT<br/>         CAGTGAGGCACCTATCTCAGCGATCTGTCTATTTTCGTTCCATCCATAGTTGCCTGACTGC<br/>         CCGTCTGTAGATAACTACGATACGGGAGGGCTTACCATCTGGCCCCAGTGCTGCAAT<br/>         GATACCGCGAGACCCACGCTCACCGGCTCCAGATTTATCAGCAATAAACCAGCCAGCC<br/>         GGAAGGGCCGAGCGCAGAAGTGGTCTGCAACTTTATCCGCCTCCATCCAGTCTATTA<br/>         ATTGTTGCCGGAAGCTAGAGTAAGTAGTTCGCCAGTTAATAGTTTGCGCAACGTTGT<br/>         TGCCATTGCTACAGGCATCGTGGTGTACGCTCGTCGTTTGGTATGGCTTCATTAGCT<br/>         CCGGTTCCCAACGATCAAGGCGAGTTACATGATCCCCATGTTGTGAAAAAAGCGGT<br/>         TAGCTCCTTCGGTCTCCGATCGTTGTGAGAAGTAAGTTGGCCGAGTGTTATCACTCA<br/>         TGCTTATGGCAGCACTGCATAATTCTTACTGTCATGCCATCCGTAAGATGCTTTTCT<br/>         GTGACTGGTGAAGTCAACCAAGTCACTTCTGAGAATAGTGTATGCGGCGACCGAGT<br/>         TGCTCTTGCCCGCGTCAATACGGGATAATACCGCGCCACATAGCAGAAGTTAAAAG<br/>         TGCTCATCATTGAAAAAGTCTTTCGGGGCGAAAACCTCAAGGATCTTACCGCTGTT<br/>         GAGATCCAGTTCGATGTAACCCACTCGTGCACCCAAGTATCTTACGATCTTTTACTT<br/>         TCACCAGCGTTTCTGGGTGAGCAAAAACAGGAAGGCCAAAATGCCGCAAAAAGGGA<br/>         ATAAGGGCGACACGGAATGTTGAATACTCATACTTCTCTTTTCAATATTATTGAAG<br/>         CATTTATCAGGGTTATTGTCTCATGAGCGGATACATTTGAATGTATTTAGAAAAATA<br/>         AACAAATAGGGGTTCCGCGCACATTTCCCCGAAAAGTGCCACCTG</p> |
| <p>rx2::LoxPN3ICD</p> | <p>CAAGGCTAGCGCCACCATGGTGAGCAAGGGCGAGGAGGACAACATGGCCATCATCA<br/>         AGGAGTTCATGCGCTTCAAGGTGCACATGGAGGGCTCCGTGAACGGCCACGAGTTGCG<br/>         AGATCGAGGGCGAGGGCGAGGGCCGCCCTACGAGGGCACCCAGACCGCCAAGCTG<br/>         AAGGTGACCAAGGGCGGCCCTGCCCTTCGCTGGGACATCTGTCCCCTCAGTTCA<br/>         TGTACGGCTCAAGGCCTACGTGAAGCACCCCGCGACATCCCCGACTACTTGAAGCT<br/>         GTCCTTCCCCGAGGGCTTCAAGTGGGAGCGCGTGATGAACCTCGAGGACGGCGGCGT<br/>         GGTGACCGTGACCCAGGACTCCTCCCTGCAGGACGGCGAGTTCATCTACAAGGTGAA<br/>         GCTGCGCGGCACCAACTTCCCCTCCGACGGCCCCGTAATGCAGAAGAAGACCATGGG<br/>         CTGGGAGGCCTCCTCCGAGCGGATGTACCCCGAGGACGGCGCCCTGAAGGGCGAGA<br/>         TCAAGCAGAGGCTGAAGCTGAAGGACGGCGGCCACTACGACGCCGAGGTCAAGACC<br/>         ACCTACAAGGCCAAGAAGCCGTGCAGCTGCCCGCGCCTACAACGTCAACATCAAG<br/>         CTGGACATCACCTCCACAACGAGGACTACACCATCGTGGAACAGTACGAGCGCGCC<br/>         GAGGGCCGCACTCCACCGCGGCATGGACGAGCTGTACAAGAGATCTCGAATCACA<br/>         AGTTTGTACAAAAAGCAGGCTTATGTTGGTATGTTGATTGCCCGCCGAAGCGT<br/>         GAACACAGCACACTCTGGTCCCTGAGGGCTTCTTCTCAAAAAGGAAACAAGCAGTA<br/>         ACAAGAACCGCAGAGAACCTGTGGGCCAAGATTCACTGGGCATGAAACACATGCCAA<br/>         AGACAGTGGAAAGAGTCTTTCTGGCTGATCACAGTGACCAGTGGATAGATACAGACT<br/>         GCCCAGAGGCTAAGCGACTTAAGGTGGAAGAACCAAGCATTCTGTGATGGTGAG<br/>         GATGCAGTTGACAGCAGACAGTGGACACAGCATCACTGGCAGCAGCAGATATCCGC<br/>         ATGCCACCTTCCATGGCACTTACACCACCACAAGGAGAGTTTGCAGTACTGATGG<br/>         ATGTTAATGTCAGAGGCCCTGATGGCTTACACCTCTGATGCTGGCATCTTTCTGTGG</p>                                                                                                                                                                                                                                                                                                                                                                                                                                                                                                                                                                                                                                                                                                                                                                                                                          |

AGGAGGGCTTGAGCCAGAGGTGACCGAAGATGATGACTCAGATGAATCCTCAGCCA  
ACATCATATCTGACCTCATTTACCAGGGAGCATCACTTGCAGCTCAAACCTGACCGCACT  
GGAGAGACTGCTCTGCACCTGGCTGCACGCTATGCCCGGGCAGATGCAGCTAAAAGA  
CTCCTGGATGCTGGGGCTGATGCAAATGCACAGGATAACACAGGTCGCTCACCTTTGC  
ATGCAGCTGTGGCAGCTGATGCACAGGGAGTTTTCCAGATTCTGATCAGGAACCGTG  
CCACAGACTTGGACGCGCATGTATGATGGTCCACTGCTCTGATACTTGCAGCCCG  
TCTGGCAGTAGAGGGCATGGTGGAAGAGTTGATCACCTGCCATGCTGATGTTAATGC  
TGTTGATGAAATCGGAAAGTCAGCATTGCACTGGGCAGCAGCAGTCAATAACGTTGA  
AGCTACTATTGCCTTGTTGAAGAATGGTGCCAATAAAGATATGCAAGACCTCAAGGA  
GGAGACTCCGCTGTTCTTGGCTGCCAGGGAAGGCAGCTGTGAGGCAGTAAAGGTGTT  
GTTGGCTCACTTTGCCAATAGGGAAATAACAGATCACATGGACAGACTCCCTCGAGAT  
ATTGCCCAGGAGCGCATGCATCATGACATTGTGCAGCTACTGGATGAATATAACTG  
TGCGAAGTCCACAGGGTCATGCAGGGGCAGGTCACCACCTCTCTGGTAGCCACACAC  
TCTCACCGCTCATGTGCCCTCCAGCAACTTCTCCAAGGGCTGAAAAGTACCCCTCAG  
GGTAAGAAGAACCGTCGCCCCGGGAGCTAAAGGCATTGGTGGACAGCACGCTTCCGG  
CCTGAAAGATTCAGCCAAAGGACGCAACAAACGGCTGACTCTAGACATGCAGAGTGC  
TTTGCTGGAGAGCTCTGTACGCTCTCCCCTGTTGACTCACTGGATTACCACGAGGA  
GGCGCCAGTAACGCTGGCTATGTCACCAATCCAACCTCACCAGCTGCCATGCCCTCTC  
CCGGCCTTTTCCACTCCTCTATGTCTGTCCCTAATACCCCATGGTGCACAGCAGTATC  
CTGGACAGCACCAGCCCTTTTCTGTCTCCCTGGCACAGTTGAGTGACCTGGGAGATG  
GTGGGCTCTCAATGCAGGGGCGTGTGGGCATGCAAGGAGGGGGTGTCAACCCAGGC  
CCCCATAACTACGTGATGAACGCCGGTCAAATGAGCCTTAGTATGGGCATGGTAAGTC  
CAGTAAGCGTGCCGTTTGACTGGCATAACCGCATGCCTCCATCTTCTCAGTGCAGTCA  
GCCAATGATCAGCATGGTGCATCCAGTAAGTAGTCAAGCAGGCATGCTCCCACAAAC  
ACCAACCCTGCAAAGCAGCATGCTATTGCACCAGCAGGTGTTCCGTAATGCCCAGCAG  
CCCATCCTGCAGACCCAGCTTTCTTGTACAAAGTGGTGATTGAGCCTCTAGAACTATA  
GTGAGTCGTATTACGTAGATCCAGACATGATAAGATACATTGATGAGTTTGGACAAAC  
CACAAGTAAAGTGCAGTGAAAAAATGCTTTATTTGTGAAATTTGTGATGCTATTGCTT  
TATTTGTAACCATTATAAGCTGCAATAAACAAGTTAACAACAACAATTGCATTCATTTT  
ATGTTTCAGGTTCCAGGGGGAGGTGTGGGAGGTTTTTTAATTCGCGGCCGCGACTCTA  
GAACTATAGTGAGTCGTATTACGTAGATCCAGACATGATAAGATACATTGATGAGTTT  
GGACAAACCACAAGTAAAGTGCAGTGAAAAAATGCTTTATTTGTGAAATTTGTGATG  
CTATTGCTTTATTTGTAACCATTATAAGCTGCAATAAACAAGTTAACAACAACAATTGC  
ATTCATTTTATGTTTCAGGTTCCAGGGGGAGGTGTGGGAGGTTTTTTAATTCGCGGCCG  
GGGGGGTGGAGCTCCAGCTTTTGTCCCTTTAGTGAGGGTTAATTGCGCGCATTACCC  
TGTTATCCCTACGCGCTTGGCGTAATCATGGTCATAGCTGTTTCTGTGTGAAATTGTT  
ATCCGCTCACAATTCCACACAACATACGAGCCGGAAGCATAAAGTGTAAGCCTGGG  
GTGCCAATGAGTGAGCTAACTCACATTAATTGCGTTGCGCTCACTGCCCGCTTTCCAG  
TCGGGAAACCTGTCGTGCCAGCTGCATTAATGAATCGGCCAACGCGCGGGGAGAGG  
CGGTTTGCATATTGGGCGCTCTCCGCTTCTCGCTCACTGACTCGCTGCGCTCGGTGCG  
TTCGGCTGCGGCGAGCGGTATCAGCTCACTCAAAGGCGGTAATACGGTTATCCACAG  
AATCAGGGGATAACGCAGGAAAGAACATGTGAGCAAAGGCCAGCAAAGGCCAG  
GAACCGTAAAAAGGCCGCGTTGCTGGCGTTTTTCCATAGGCTCGGCCCCCTGACGA  
GCATCACAATAATCGACGCTCAAGTCAGAGGTGGCGAAACCCGACAGGACTATAAAG  
ATACCAGGCGTCCCCCTGGAAGCTCCCTCGTGCCTCTCTGTTCCGACCCTGCCGC  
TTACCGGATACCTGTCCGCTTTCTCCCTTCCGGAAGCGTGGCGCTTTCTCAATGCTCA  
CGCTGTAGGTATCTCAGTTCGGTGTAGGTGTTTCCGTTCCAAGCTGGGCTGTGTGCACG  
AACCCCGTTTCCAGCCCGACCGCTGCGCCTTATCCGGTAAGTATCGTCTTGTGATCCAAC  
CCGGTAAGACACGACTTATCGCCACTGGCAGCAGCCACTGGTAACAGGATTAGCAGA  
GCGAGGTATGTAGGCGGTGCTACAGAGTCTTGAAGTGGTGGCCTAACTACGGCTAC  
ACTAGAAGGACAGTATTTGGTATCTGCGCTCTGCTGAAGCCAGTTACCTTCGGAAAAA  
GAGTTGGTAGCTCTTGTATCCGGCAAACAACCACCGCTGGTAGCGGTGGTTTTTTTGT  
TTGCAAGCAGCAGATTACGCGCAGAAAAAAGGATCTCAAGAAGATCCTTTGATCTTT

TCTACGGGGTCTGACGCTCAGTGGAAACGAAAACCTCACGTTAAGGGATTTTGGTCATG  
AGATTATCAAAAAGGATCTTCACCTAGATCCTTTTAAATTA AAAATGAAGTTTTAAATC  
AATCTAAAGTATATATGAGTAACTTGGTCTGACAGTTACCAATGCTTAATCAGTGAG  
GCACCTATCTCAGCGATCTGTCTATTTTCGTTTCATCCATAGTTGCTGACTGCCCGTCGT  
GTAGATAACTACGATACGGGAGGGCTTACCATCTGGCCCCAGTGCTGCAATGATACC  
GCGAGACCCACGCTCACCGGCTCCAGATTTATCAGCAATAAACCCAGCCAGCCGGAAG  
GGCCGAGCGCAGAAGTGGTCTGCAACTTTATCCGCCTCCATCCAGTCTATTAATTGTT  
GCCGGGAAGCTAGAGTAAGTAGTTCGCCAGTTAATAGTTTGCGCAACGTTGTTGCCAT  
TGCTACAGGCATCGTGGTGTACGCTCGTCGTTTGGTATGGCTTCATTAGCTCCGGTT  
CCCAACGATCAAGGCGAGTTACATGATCCCCATGTTGTGAAAAAAGCGGTTAGCTC  
CTTCGGTCTCCGATCGTTGTGAGAAGTAAGTTGGCCGAGTGTTATCACTCATGCTTA  
TGGCAGCACTGCATAATTCTTACTGTTCATGCCATCCGTAAGATGCTTTTCTGTGACT  
GGTGAGTACTCAACCAAGTCATTCTGAGAATAGTGTATGCGGCGACCGAGTTGCTCTT  
GCCCCGCGTCAATACGGGATAATACCGCGCCACATAGCAGAACTTTAAAAGTGCTCAT  
CATTGGAAAACGTTCTTCGGGGCGAAAACCTCAAGGATCTTACCGCTGTTGAGATCC  
AGTTTCGATGTAACCCACTCGTGCACCCAACCTGATCTTCAGCATCTTTACTTTACCAG  
CGTTTCTGGGTGAGCAAAAACAGGAAGGCAAATGCCGCAAAAAGGGAATAAGGG  
CGACACGGAATGTTGAATACTCATACTCTCCTTTTCAATATTATTGAAGCATTATC  
AGGGTTATTGTCTCATGAGCGGATACATATTTGAATGTATTTAGAAAAATAACAAT  
AGGGGTTCCGCGCACATTTCCCCGAAAAGTGCCACCTGAAATTGTAACGTTAATATT  
TTGTTAAAATTCGCGTTAAATTTTTGTTAAATCAGCTCATTTTTTAACCAATAGGCCGA  
AATCGGCAAAATCCCTTATAAATCAAAGAATAGACCGAGATAGGGTTGAGTGTGTT  
CCAGTTTGGAAACAAGAGTCCACTATTAAGAACGTGGACTCCAACGTCAAAGGGCGA  
AAAACCGTCTATCAGGGCGATGGCCCACTACGTGAACCATCACCTAATCAAGTTTTTT  
GGGGTTCGAGGTGCCGTAAAGCACTAAATCGGAACCTAAAGGGAGCCCCCGATTTAG  
AGCTTGACGGGGAAAGCCGCGAACGTGGCGAGAAAGGAAGGGAAGAAAGCGAAA  
GGAGCGGGCGCTAGGGCGCTGGCAAGTGTAGCGGTACGCTGCGCGTAACCACCAC  
ACCCGCCGCGTTAATGCGCCGCTACAGGGCGCGTCCCATTCGCCATTAGGCTGCGC  
AACTGTTGGGAAGGGCGATCGGTGCGGGCCTCTTCGCTATTACGCCAGCTGGCGAAA  
GGGGGATGTGCTGCAAGGCGATTAAGTTGGGTAACGCCAGGGTTTTCCAGTCACGA  
CGTTGTAAAACGACGGCCAGTGAGCGCGTAGGGATAACAGGGTAATGCGCGCGTAA  
TACGACTCACTATAGGGCGAATTGGGTACCGCTGCACCGACTTTCTTCATGGTGACCA  
TATGGCAGCAGCCTGTTTCATGGCAAATCCCCTGCTGTGGTGGAAATCCTGAACGTCTT  
TAATTCATGAAGAGGCAAAAGTAAAGGCTGCTCAGTCTCTCTGTTCTCGAAAACAAC  
TCTGACAACCGAGAACCCTCGTCGGCCTAAGCCACTTAACCTTTAGTCAGTCTGCTCAC  
CCGTTCTTCTGCAAAGGTTTTAACTTGTTTAACTTTAAATTTCTCAGCTGCTTACAG  
TAAGCATATCCCTGACTCAAAGAAGTTGATGTGTTTGTGGAAGATCAGGTGAGGAC  
ATGCGAAAACACGTTTACGCTTATACCAGCCTCCAGCTCGCTGCTTTATCCAGATTCTGC  
ATGAAATGCTGGTGTGTTGTCAACGATGCTGAGATATAAGCCATTGAATCCACTGT  
GGTCCATTTACAACGAATGTTGAAAACAAAATGAGAAAGAAAACACAGACATTCTC  
AGAAATTCATCTGAGGAAATGAAAATATGAAAATCATAGAAACATTCATACGTCAC  
ATAATATACACAGTAACATCACTGTTTTATTTCAAATGTAGAAGAAAAAAAACCTTCTG  
ATAACTGAAGAGAGACGTCACCTTAATCATCTACTGGCTTGATGAAGGCTTGTTAAAC  
TGTTAAACACACACTTTTACGCGATGGAAGCACGAGAGGAACTCCTAAAAATATCTTCA  
GGTAGGGGGTAGTGAGGTGAGAGAAAATCTCTGGGGAAGTATTTAGGCCTATTAAG  
GATGGGCTTGATCTCTGCAACACCTACTGTAGCTGCGACAGCTCTGGTTTTTCCAGCT  
GGCAAAGCAGAATTGACCTCCCACTTTGGACTTTATCTCCAAATGATCCAAATATTGG  
AGCATATCTAACTAAAGCTCGTCAATGAGAGCATCATGGGAGCGGATGGTTAAA  
GAGCGCTCGTTCAGTAATGATCTTTGCTTGAGTAAATTAATCAAAGTGAGACCTCTG  
CTTGATTTTGGACCAATAGATTGATAGTTTTAGAGAAAATCTAAAATAAATTCAAAC  
GTGAAATCTCAAACAGCAATCAAACATGTTAAATAAAGAAAATGCATCTTTGTTTTAT  
TTCATCAGCACTTTCTATTTCTAAAACAGTTGTTTCAAATTAGACGCCTCATTGTATGC  
AACTATTTAATGTACAGTGTGTAGCCATTCAAGTCCATCCCTGTCTTTTCTCCGTGTTAT

GTCTGTAATGAAGGGATTAACGAAAACCTCCACACAAGCCATTATCTTTAGACAAT  
AGATTTGTTGAAAGGAAGTTTTGTTGAGGCTTCATTAGCAATGGCCTCCCTCTGTGGT  
CTGAAAGCAGGACACATTTGGAGCAATTAAGGAGGAGTTTTGTCGGCAGAGGAGGA  
TTAAAGGGGAAGGATTCCAATTAATAAACCTCTTA AACCCCTCAGGTTTTACTACCATTC  
CAGCAGCCTGCTCTGGTGTCTCTTGTGGTTAAGAGGAGTTTTGTCGGCAGAGGAGGA  
CATTGCATGTTCTGGTTGCAACGATCTTTGCTCAGTTATTTGAAAGGAGCTTTAAGGA  
TTTCACGGCGAGCAACAAGTGTT CAGAGTAGACACTGCAGTTGGTTCTACTTATGGAC  
GATGTGAGGAGTAGACCGTCAAGAAACCTGAACGAAGGTAAGACGGTTACATGTTTT  
TGCATTTCTCAGTTACATGTTTGGATGTGCTTTCTATCATCCATGTGGGAAATGGGAA  
CGTTGTT CATGAAAATCTGTTTTATAGTTTCTCTCACACAGAGACCTTTTTGTAGAAGA  
CAAATAATAAATTCTCTGATCTACTAAGTCATGCTGAGATACAATTACAACCTATAAA  
GCATATTTCTGCACACTTCCAACAAGAGATACAGGGGAAAAAACGCACATTCTTCCTG  
AACTTTTTTCTAAAGCATGTCAAAACGTAGAAGCGTTATCCAGGGAAAGGGAGATT  
AAGCAAAGGAAACTGACAGGCATGTGGATTAAGAACAAGGGTGCAGGCCAGGCAA  
CAGCAGGTTATTCATGAGCTACAAAAAAACTGCTCAACCAGTTTTGATTTCAAACCTT  
TCTCTGAATAAATATCTTTTGTGGTAGTGGATGTGGAGATCGTTTTAAATGATGTC  
TGTCGAAACTTTCTATAAAAGTACTTACTGAAAGTTGTGGTGTGCAGTTTTACAGTT  
TTGTGTTTTAATGTTTTGCAGAGAAAGATGTGAGTCATCTCTGTGGACAAAAACCTG  
CTGAGGTCTGCTCTTCTGTTCCAGAGGCACAAGA ACTATTTGTTGATCATCTCAGTTGG  
TAGACTTTGACTTTTTTTGACAAGAATCAGAAAGTGAGTCAAAGGCAAGTCCAGGG  
CCCCCCTCGAGGTCGACGGTATCGATAAGCTTGATTTAGGTGACACTATAGAATACA  
AGCTACTTGTCTTTTTGCAGGATCCAAGCTTATAACTTCGTATAGCATA CATTATACG  
AAGTTATCCGGTCGCCACCATGGTGAGCAAGGGCGAGGAGCTGTTACCCGGGGTGG  
TGCCCATCCTGGTCGAGCTGGACGGCGACGTA AACGGCCACAAGTTCAGCGTGTCCG  
GCGAGGGCGAGGGCGATGCCACCTACGGCAAGCTGACCCTGAAGTTCATCTGCACCA  
CCGGCAAGCTGCCCGTGCCTGGCCACCCTCGTGACCACCTGACCTACGGCGTGCA  
GTGCTTCAGCCGCTACCCGACCACATGAAGCAGCAGACTTCTTCAAGTCCGCCATG  
CCCGAAGGCTACGTCCAGGAGCGCACCATCTTCTTCAAGGACGACGGCAACTACAAG  
ACCCGCGCCGAGGTGAAGTTCGAGGGCGACACCCTGGTGAACCGCATCGAGCTGAA  
GGCATCGACTTCAAGGAGGACGGCAACATCCTGGGGCACAAGCTGGAGTACA ACT  
ACAACAGCCACAACGTCTATATCATGGCCGACAAGCAGAAGAACGGCATCAAGGTGA  
ACTTCAAGATCCGCCACAACATCGAGGACGGCAGCGTGCAGCTCGCCGACCACTACC  
AGCAGAACACCCCATCGGCGACGGCCCCGTGCTGCTGCCCGACAACCACTACCTGA  
GCACCCAGTCCGCCCTGAGCAAAGACCCCAACGAGAAGCGCGATCACATGGTCCTGC  
TGGAGTTCGTGACCGCCGCGGGATCACTCTCGGCATGGACGAGCTGTACAAGTAAA  
GCGGCCGGCCGCGACTCTAGATCATAATCAGCCATACCACATTTGTAGAGGTTTTACT  
TGCTTTAAAAAACCTCCACACCTCCCCGTGAACGTGAAACATAAAAATGAATGCAATT  
GTTGTTGTTAACTTGTTATTGCAGCTTATAATGGTTACAAATAAAGCAATAGCATCAC  
AAATTTCAAAATAAAGCATTTTTTTCACTGCATTCTAGTTGTGGTTTGTCCAAACTCAT  
CAATGTATCTTAAGGCGTAAATTGTAAGCGTTAATTTTTGTTAAAATTCGCGTTAAAT  
TTTTGTTAAATCAGCTCATTTTTTAACCAATAGGCCGAAATCGGCAAAATCCCTTATAA  
ATCAAAAAGAAATAGACCGAGATAGGGTTGAGTGTGTTCCAGTTTGGAAACAAGAGTCC  
ACTATTAAGAACGTGGACTCCAACGTCAAAGGGCGAAAAACCGTCTATCAGGGCGA  
TGGCCCACTACGTGAACCATCACCTAATCAAGATAACTTCGTATAGCATA CATTATAC  
GAAGTTATA
